# Supplementary material for: Olive oil and body fat: a systematic review withmeta-analysis
Source: Royal Society of Chemistry journal article supplement (doi:10.1039/d3fo00488k), 2023-01-01
Supplement: d3fo00488k1.xlsx [file d3fo00488k1.xlsx]

## Sheet: Planilha1
Author	Ano	Nome do artigo	nº registro clinical trials	Parallel or Crossover	País	n total	caracteríticas da população	idade (média ± DP) se min e max descrever	IMC (média ± DP) se min e max descrever	Sexo masculino (n)	Sexo masculino (%)	Tempo de intervenção (semanas) 1mês = 4 semans	Veículo para entrega do azeite (alimento, cápsula,,,)	objetivo do estudo	intervenção A	Descrição da intervenção A	Quantidade intervenção A	intervenção B	Descrição da intervenção B	Quantidade intervenção B	Desfecho (ex,: peso, IMC, % GC total, %GC em diferentes regiões, CC, RCQ)	n_final_intervA	n_randomizado_A	media_finalA	SD_finalA	Delta A (final - inicial)	SD delta A	n_final_intervB	n_randomizado_B	media_finalB	SD_finalB	Delta B (final - inicial)	SD delta B	Outra forma de resultado ex,: % que ganhou peso; RR ou OR, etc,	Observação dados disponíveis (erro padrão da média ou do delta, IC 95% da média ou delta, valor p da diferença pré e pós intervenção de cada braço, gráfico com média ou deltas)
Félix-Soriano et al, 2021 a															Olive oil	6 cápsulas de 0,5 g	3 g	Ômega-3	Concentrado de óleo de peixe rico em DHA, 1650 mg/dia de DHA e 150 mg/dia de EPA, totalizando 1950 mg/dia de PUFA	3 g	Fat mass (%)	10	21	45.17	6.48	-2.27	1.14	7	21	45.17	6.6	-1.58	1.34
Félix-Soriano et al, 2021 b															Olive oil	6 cápsulas de 0,5 g	3 g	DHA-rich fish oil concentrate + resistance training	6 cápsulas seguidas de programa progressivo de treino de resistência (2x/semana)	3 g	Fat mass (%)	10	21	45.17	6.48	-2.27	1.14	8	22	44.58	6.6
Félix-Soriano et al, 2021 c															Olive oil + resistance training			Ômega-3				10	21	45.28	6.6			8	21	45.17	6.6
Félix-Soriano et al, 2021 d															Olive oil + resistance training	6 cápsulas de 0,5 g	3 g	DHA-rich fish oil concentrate + resistance training	6 cápsulas seguidas de programa progressivo de treino de resistência (2x/semana)	3 g	Fat mass (%)	10	21	45.28	6.6	-2.27	1.14	8	22	44.58	6.6	-2.12	2.4
Jannas-Vela et al, 2020	2020	Resting metabolic rate and skeletal muscle SERCA and Na+/K+ ATPase activities are not affected by fish oil supplementation in healthy older adults,	NCT02338401	Parallel	Canada	24	Healthy physically active elderly	65 ± 3,27	NI	8	33.33	12	capsula	to examine the effects of fish oil (FO) on RMR, substrate oxidation, and skeletal muscle SERCA and NKA pump function in healthy older individuals	Olive oil	Olive oil	5g/dia	Fish oil	Fish oil - Omega-3 Complete (1 g FO/capsule, Jamieson Laboratories Ltd,) / (2 g / dia de ácido eicosapentaenóico e 1 g / dia docosahexaenóico)	5g/dia (2g/day Epa + 1g/day DHA)	body fat (%)	11	12	33.7	8.62	0.6	NI	11	12	35.2	6.3	0.5	NI		Sem diferença intragrupo (12semanas x baseline)
Khaw et al, 2018 a															Olive oil	Extra virgin olive oil	50g/dia	Coconut oil	Extra virgin coconut oil	50g/dia	body fat (%)	15	33	31.63	6.48	0.13	1.3	28	30	29.94	6.6	0.24	1.03		Sem diferença intragrupo (4 semanas x baseline)
Khaw et al, 2018 b															Olive oil	Extra virgin olive oil	50g/dia	Butter	Butter	50g/dia	body fat (%)	15	33	31.63	6.48	0.13	1.3	33	33	29.54	6.6	0.34	1.31
Kreider et al, 2002															Olive oil	Olive oil	9 g/day	CLA	CLA (com 3 g de ácidos graxos)	6g/dia	Body fat (%)	11	11	15.9	1.5	0.03	0.2	12	12	15.3	2.1	0.3	0.3
Kruse et al, 2020															Olive oil	Refined olive oil	45g/dia	Rapessed oil	Refined rapessed/Canola oil	46g/dia	Body fat (%)	11	11	35.4	2	0	NI	15	16	34.7	1.6	-0.66	NI		Sem diferença intragrupo (8 semanas x baseline)
Larsen et al, 2006															Olive oil	Hypocaloric diet + olive oil	4,5 g/dia	Hypocaloric diet + CLA	CLA ( of a mixture of c9,t11 and c10,t12 as triacylglycerols)	3,4g/dia	Boddy fat (%)	43	50	35.2	9.3	1.4	3.9	40	51	33.7	8.7	1.1	4		Sem diferença intragrupo (52 semanas x baseline)
Loganathan et al, 2022 a															Extravirgin olive oil	SFA 16,89% / MUFA 72,36% / PUFA 10,76%	36,2 g	Palm oil	SFA 39,76% / MUFA 47,64% / PUFA 12,61%	36,2g	Fat (%)	20	44	28.63	5.93	NI	NI	40	44	28.68	5.21	NI	NI	NI
Loganathan et al, 2022 b															Extravirgin olive oil	SFA 16,89% / MUFA 72,36% / PUFA 10,76%	36,2 g	Cocoa butter	SFA 63,32% / MUFA 33,34% / PUFA 3,33%	36,2g	Fat (%)	20	44	28.63	5.93	NI	NI	40	44	28	7.75	NI	NI
López-Plaza et al, 2013															Olive oil	Olive oil + 200 mL skimmed milk	3g/dia	CLA	CLA + 200 ml skimmed milk	3g/dia	Fat mass %	16	20	36.81	6.2	-0.44	1.34	22	22	36.65	5.64	-1.02	2.13	Redução significativa no grupo CLA,	Com diferença intragrupo (24 semanas x baseline)
Park et al, 2008															Olive oil + AF (3 x/sem)	olive oil	2,4g/dia	CLA + AF (3 x/sem)	CLA (mixture containing 36,9% of cis-9, trans-11 and 37,9% of trans-10, cis-12)	2,4g/dia	% Body fat	15	15	31.4	4.64	-0.14	1.35	15	15	31.1	4.26	-0.52	1.7		Sem diferença entre os grupos (8 semanas x baseline)
Parker et al, 2019															Olive oil	Olive oil	2g/dia	Fish oil	fish oil (total daily dose: 1728 mg marine triglycerides, of which 588 mg EPA and 412 mg DHA, combined with 200 mg antioxidant, coenzyme Q10)	2g/dia	Body fat (%)	25	25	23.1	6.48	0	1.5	25	25	22.6	6.6	-0.2	2
Pérez et al, 2016 a															Olive oil	MedDiet + extra-virgin olive oil	128,5g/dia	Nuts	MedDiet + mixed nuts 30 g/day (15 g walnuts, 7,5 g hazelnuts, and 7,5 g almonds)	30g/dia	Total body fat %	56	117	34.8	6.48	-0.2	0.38	102	117	37	6.6	0.6	0.46	Reduções significativas no grupo azeite e aumento no grupo controle (p 0,02)	Com diferença intragrupo (48 semanas x baseline)
Pérez et al, 2016 b															Olive oil	MedDiet + extra-virgin olive oil	128,5g/dia	Control	Advice to a low-fat diet	NI	Total body fat %	56	117	34.8	6.48	-0.2	0.38	98	117	38.1	6.6	1	0.38
Prater et al, 2022															Olive oil	Azeite de oliva extravirgem em 2 refeições/dia	30% das calorias	Óleo de algodão	Óleo de algodão em 2 refeições/dia	20% das calorias	Body fat (%)	22	27	34	12.19	0.4	NI	21	22	32.1	8.7	1.1	NI	NI
Rezaei et al, 2019															Olive oil	Low calorie diet + exercise + olive oil	20 g/dia	Sunflower oil	Low calorie diet + exercise + sunflower oil	20 g/dia	Body fat (%)	26	32	33.8	7.3	-3.4	5.5	28	34	33.5	10.7	0.38	5.2	Redução no grupo azeite	Com diferença intragrupo (12 semanas x baseline)
Risérus et al, 2004															Olive oil	olive oil; 83% triacylglycerol	3g/dia	CLA	(6 capsules/d; 1% of total energy intake) as c9,t11 CLA (83% triacylglycerol)	3g/dia	Total percentage body fat (%)	12	12	36.33	6.48	-0.87	2.63	13	13	36.32	6.6	0.62	1.86		Sem diferença intragrupo (12 semanas x baseline)
Sales et al, 2005 a															Olive oil	Olive oil+milkshake	50,4g/dia	Peanut oil	Peanut oil+milkshake	51,5g/dia	body fat %	3	8	20.7	6.48	2.6	NI	8	8	24.8	6.6	0.4	NI
Sales et al, 2005 b															Olive oil	Olive oil+milkshake	50,4g/dia	Safflower oil	Sanfflower oil+milkshake	51,5g/dia	body fat %	3	8	20.7	6.48	2.6	NI	8	8	25.7	6.6	4.1	NI
Sales et al, 2005 c															Olive oil	Olive oil+milkshake	50,4g/dia	Controle	Controle	Não recebeu milkshake	body fat %	2	8	20.7	6.48	2.6	NI	8	8	24.9	6.6	2.4	NI
Shen et al, 2018 a															Olive oil	olive oil	0,43g/dia	Low tocotrienol oil	Low tocotrientol oil	0,43g /day from DeltaGold 70 containing 300 mg tocotrienol	% Body fat	14	29	38.97	7.22	-0.16	NI	30	30	39.37	7.59	0.36	NI
Shen et al, 2018 b															Olive oil	olive oil	0,43g/dia	High tocotrienol oil	High tocotrienol oil	0,86 g/day from DeltaGold 70 containing 600 mg tocotrienol	% Body fat	14	29	38.97	7.22	-0.16	NI	29	30	39.81	7.28	0.4	NI		Sem diferença intragrupo (12 semanas x baseline)
Silveira et al, 2020 a															Olive oil	Extra virgin olive oil	46,8g/dia	DieTBra	4-6 meals/day and an individualized food plan calculation	NI	Body fat (%)	14	34	51.9	4.7	0.64	2.43	32	38	51.4	4.8	0.27	2.59		Sem diferença intragrupo (12 semanas x baseline)
Silveira et al, 2020 b															Olive oil	Extra virgin olive oil	46,8g/dia	DieTBra + Olive oil	DieTBra+Extra virgin olive oil	52 mL / dia	Body fat (%)	14	34	51.9	4.7	0.64	2.43	37	39	52.7	6	0.13	2.25
Smedman et al, 2001															Olive oil	Olive oil	4,2g/dia	CLA	capsules contained 75,9% CLA with equal amounts of the CLA isomers cis-9,trans-11 and trans-10,cis-12,	4,2g/dia	Body fat (%)	24	24	29.2	6.48	-0.4	NI	26	26	28.2	6.6	-1.1	NI
Sravrinou et al, 2020															Olive oil	Virgin olive oil	18g/dia	Omega 3 and omega 6	Omega 3, omega 6, vitamin A, vitamin Eand gama tocopherol	20g/dia	Total body fat (%)	18	23	40.5	7.5	-0.6	NI	18	23	35.9	7.3	-1.2	NI
Syvertsen et al, 2007															Olive oil	Olive oil	4,5 g/dia	CLA	37,5% cis-9 trans-11 and 38% trans-10 cis-12	3,4 g/dia	Body fat (%)	17	23	41.8	6.48	-0.4	0.68	24	26	41.2	6.6	-0.65	0.84	redução na CC no grupo CLA (baseline x 6 meses)	Com diferença intragrupo (24semanas x baseline)
Tapsell et al, 2013 a															Olive oil	low calorie + olive oil	1g/dia	Fish + olive oil	low calorie + fish + olive oil	fish 180g/semana e olive oil 1g/dia	Body fat (%)	7	39	34.4	7.6	-2.3	NI	16	39	37.4	8.1	-0.6	NI
Tapsell et al, 2013 b															Olive oil	low calorie + olive oil	1g/dia	Fish + EPA/DHA	low calorie + fish + eicosapentaenoic acid (EPA)/docosahexanoic acid (DHA) suplement	fish 180g/semana e EPA/DHA suplement (420 mg EPA + 210 mg DHA; Blackmore’s Promega Heart, Blackmores Australia),	Body fat (%)	7	39	34.4	7.6	-2.3	NI	16	36	34	10.2	-2	NI
Taylor et al, 2006															Olive oil	Olivel oil	4,5 g/day	CLA	CLA mixture	4,5 g/day	Boddy Fat % (bioimpedance)	19	19	30.1	6.48	1.1	2.9	21	21	28.1	6.6	0.1	1.7		Sem diferença intragrupo (12 semanas x baseline)
