# Supplementary material for: Olive oil and body fat: a systematic review withmeta-analysis
Source: Royal Society of Chemistry journal article supplement (doi:10.1039/d3fo00488k), 2023-01-01
Supplement: d3fo00488k2.xlsx [file d3fo00488k2.xlsx]

## Sheet: Planilha1
Author	Ano	Nome do artigo	nº registro clinical trials	Parallel or Crossover	País	n total	caracteríticas da população	idade (média ± DP) se min e max descrever	IMC (média ± DP) se min e max descrever	Sexo masculino (n)	Sexo masculino (%)	time	vehicule	objetivo do estudo	intervenção A	Descrição da intervenção A	Quantidade intervenção A	dose	intervenção B	Descrição da intervenção B	type	Quantidade intervenção B	Desfecho (ex,: peso, IMC, % GC total, %GC em diferentes regiões, CC, RCQ)	n_final_intervA	n_randomizado_A	media_finalA	SD_finalA	Delta A (final - inicial)	SD delta A	n_final_intervB	n_randomizado_B	media_finalB	SD_finalB	Delta B (final - inicial)	SD delta B	Outra forma de resultado ex,: % que ganhou peso; RR ou OR, etc,	Observação dados disponíveis (erro padrão da média ou do delta, IC 95% da média ou delta, valor p da diferença pré e pós intervenção de cada braço, gráfico com média ou deltas)
Arpón et al, 2018 a												240	food		Olive oil	MedDiet + extra-virgin olive oil	128,5g/dia	128.5	Nuts	MedDiet + mixed nuts 30 g/day (15 g walnuts, 7,5 g hazelnuts, and 7,5 g almonds)	NI	30g/dia	Waist	6	12	93.8	6.4	3.7	NI	12	12	94.3	6.7	0.8	NI
Arpón et al, 2018 b												240	food		Olive oil	MedDiet + extra-virgin olive oil	128,5g/dia	128.5	Control	Advice to a low-fat diet	NI	NI	Waist	6	12	93.8	6.4	3.7	NI	12	12	92.4	9.5	0	NI
Atefi et al, 2018 a												8	food		Olive oil	Balanced diet + OO	30 g/dia	30	Canola oil	Balanced diet + Canola oil	unsaturated	30g / dia	Waist circumference (cm)	13	27	94.9	10.6	-0.3	NI	26	27	98.9	7.3	0.1	NI		Sem diferença entre os grupos (8 semanas x baseline)
Atefi et al, 2018 b												8	food		Olive oil	Balanced diet + OO	30 g/dia	30	Sunflower oil	Balanced diet + sunflower oil (SFO),	unsaturated	30 g/ dia	Waist circumference (cm)	13	27	94.9	10.6	-0.3	NI	25	27	95.2	9.3	-0.4	NI
Ciccone et al, 2014 a												60	food		Olive oil	healthy diet + olive oil	36g/dia	36	non-fried fish	healthy diet enriched with non-fried fish	NI	3 portion/week	Waist circumference (cm)	3	8	109	17.6	-2.3	NI	8	8	104.6	9.7	-1.8	NI		Com diferença intragrupo (18 semanas x baseline)
Ciccone et al, 2014 b												60	food		Olive oil	healthy diet + olive oil	36g/dia	36	Nuts	Healthy diet + nuts	unsaturated	60g/dia	Waist circumference (cm)	3	8	109	17.6	-2.3	NI	7	7	103.2	11.3	-0.2	NI
Ciccone et al, 2014 c												60	food		Olive oil	healthy diet + olive oil	36g/dia	36	Control	Healthy diet	NI	NI	Waist circumference (cm)	2	8	109	17.6	-2.3		24	24	107.3	4.1	-2.1	NI
Félix-Soriano et al, 2021 a												16	capsule		Olive oil	6 cápsulas de 0,5 g	3 g	3	Ômega-3	Concentrado de óleo de peixe rico em DHA, 1650 mg/dia de DHA e 150 mg/dia de EPA, totalizando 1950 mg/dia de PUFA	unsaturated	3 g	Waist circumference	10	21	89.66	9.85	-3.45	2.62	7	21	91.85	8.13	-3.15	2.94
Félix-Soriano et al, 2021 b												16	capsule		Olive oil	6 cápsulas de 0,5 g	3 g	3	Olive oil + resistance training	6 cápsulas seguidas de programa progressivo de treino de resistência (2x/semana)	unsaturated	3 g	Waist circumference	10	21	89.66	9.85	-3.45	2.62	8	22	89.86	8.13	-4.04	3.73
Félix-Soriano et al, 2021 c												16	capsule		Olive oil + resistance training	6 cápsulas seguidas de programa progressivo de treino de resistência (2x/semana)	3 g	3			NI			10	21	89.66	8.13	-3.01	1.8	8	21	91.85	8.13	-3.15	2.94
Félix-Soriano et al, 2021 d												16	capsule		Olive oil + resistance training	6 cápsulas seguidas de programa progressivo de treino de resistência (2x/semana)	3 g	3	DHA-rich fish oil concentrate + resistance training	6 cápsulas seguidas de programa progressivo de treino de resistência (2x/semana)	unsaturated	3 g	Waist circumference	10	21	89.66	8.13	-3.01	1.8	8	22	89.86	8.13	-4.04	3.73
Foshati et al, 2021												7.4	food		Extravirgin olive oil	Azeite de oliva extravirgem como alimento durante 52 dias	22,5 g	22.5	Sunflower oil	Óleo de girassol como alimento por 52 dias	unsaturated	22,7 g	Waist circumference	27	31	87	13.4	-2.15	2.09	28	31	92.7	10.6	-0.2	1.78	NI
Gammelmark et al, 2012 a	2012	Low-dose fish oil supplementation increases serum adiponectin without affecting inflammatory markers in overweight subjects,	NCT00885053	Parallel	Denmark	50	Adults and elderly with overweight or obesity	56,7 ± 8,5	30,1 ± 3,8	24	48	6	capsule	to investigate the hypothesis that acute and short-term supplementation with a low dose of marine n-3 PUFA exerts an anti-inflammatory effect in overweight subjects,	Olive oil	olive oil	2 g/dia	2	Control	fish oil	unsaturated	2 g / dia (640 mg eicosapentaenoic acid [EPA] and 480 mg doco- sahexaenoic acid [DHA])	waist (female) cm	13	13	100.38	12.16	0.61	NI	13	13	93.58	6.96	-1.03	NI		Sem diferença intragrupo (6 semanas x baseline)
Gammelmark et al, 2012 b												6	capsule		Olive oil	olive oil	2 g/dia	2	Control	fish oil	unsaturated	2 g / dia (640 mg eicosapentaenoic acid [EPA] and 480 mg doco- sahexaenoic acid [DHA])	waist (male) cm	12	12	108.08	6.87	0.41	NI	12	12	106.67	7.87	0.25	NI		Sem diferença intragrupo (6 semanas x baseline)
Gonzalez-Ramila et al, 2022 a												14	food		Óleo de bagaço de azeitona	OPO foi utilizado em substituição ao óleo utilizado por cada indivíduo para o preparo das refeições.	45 g/dia	45	Óleo de girassol	Óleo de girassol foi utilizado em substituição ao óleo utilizado por cada indivíduo para o preparo das refeições.	unsaturated	45 g/dia	Waist	66	NI	79.65	9.85	-0.65	3.65	132	66	79.61	8.13	-0.69	4.89	NI
Gonzalez-Ramila et al, 2022 b												14	food		Óleo de bagaço de azeitona	OPO foi utilizado em substituição ao óleo utilizado por cada indivíduo para o preparo das refeições.	45 g/dia	45	Óleo de girassol com alto teor oleico	Óleo de girassol com alto teor oleico foi utilizado em substituição ao óleo utilizado por cada indivíduo para o preparo das refeições.	unsaturated	45 g/dia	Waist	66	NI	79.65	9.85	-0.65	3.65	132	66	81.63	8.13	1.33	6.39
Green et al, 2020												8	capsule		Olive oil	Olive oil	4g/dia	4	omega 3	4 g/day (a total of 1,84g EPA+1,52g DHA/day)	unsaturated	4g/dia	Waist circumference (cm)	19	23	99	20	1	NI	19	24	99	20	0	NI		Sem diferença intragrupo (8 semanas x baseline)
Kabiri et al, 2017 a												6	food		Olive oil	Extra Virgin olive oil	32g/dia	32	Usual diet	Usual diet 15% of energy from protein, 51% from carbohydrate, 34% from total fat (16% saturated fatty acid, 8% monounsaturated fatty acid, and 10% polyunsaturated fatty acid),	NI	-	waist circumference (cm)	17	26	78	1.6	-2	0.4	17	26	78.2	1.3	-1.5	0.6	Diminuiu no grupo azeite	Com diferença intragrupo (6semanas x baseline)
Khani et al, 2021 b												24	capsule		Olive oil	Olive oil	2 g/day	2	Ômega-3	Ômega-3	unsaturated	2g/day (180 mg EPA + 120 mg DHA)	waist circumference (cm)	44	44	84.22	2.61	-0.8	NI	43	44	81.18	2.87	-3.02	NI
Khaw et al, 2018 a	2018	Randomised trial of coconut oil, olive oil or butter on blood lipids and other cardiovascular risk factors in healthy men and women,	NCT03105947	Parallel	UK	96	Healthy alduts and elderly	59,94 ± 6,14	25,08 ± 4,14	31	32.97	4	food	to compare changes in blood lipid profile, weight, fat distribution and metabolic markers after four weeks consumption of 50 g daily of one of three different dietary fats, extra virgin coconut oil, butter or extra virgin olive oil	Olive oil	Extra virgin olive oil	50g/dia	50	Coconut oil	Extra virgin coconut oil	saturated	50g/dia	waist circumference (cm)	15	33	86.79	9.85	0.59	3.25	28	30	86.69	8.13	1.29	3.31		Sem diferença intragrupo (4 semanas x baseline)
Khaw et al, 2018 b												4	food		Olive oil	Extra virgin olive oil	50g/dia	50	Butter	Butter	saturated	50g/dia	waist circumference (cm)	15	33	86.79	9.85	0.59	3.25	33	33	83.96	8.13	0.26	3.43
Kontogianni et al, 2013												6	food		Olive oil	(Chorio extra virgin olive oil, Minerva; 0,13 g ALA, 11,3 g oleic) acid)	13,5g/dia	13.5	Flaxseed oil	(Organic Flax oil, Flora; 8 g ALA, 3 g oleic acid)	unsaturated	13,9g/dia	Circunferência de cintura (cm)	37	54	76.7	8.4	-0.2	NI	37	37	77.4	8.6	0.3	NI		Sem diferença intragrupo (6 semanas x baseline)
Larsen et al, 2006												52	capsule		Olive oil	Hypocaloric diet + olive oil	4,5 g/dia	4.5	Hypocaloric diet + CLA	CLA ( of a mixture of c9,t11 and c10,t12 as triacylglycerols)	unsaturated	3,4g/dia	Waist circumference (cm)	43	50	99.7	10.8	4	6.7	40	51	97.5	8.95	4.2	5.9		Sem diferença intragrupo (52 semanas x baseline)
Lee et al, 2018 a												6	food		Olive oil	Extra virgin oil - As dietas de testetinha 2,000 kcal, com 30% kcal gordura total (sendo 20% das kcal da gordura de teste), 15% proteína kcal e 55% de carboidratos kcal,	39,6g/dia	39.6	High-oleic blended cooking oil	As dietas de teste tinham 2,000 kcal, com 30% kcal gordura total (sendo 20% das kcal da gordura de teste), 15% proteína kcal e 55% de carboidratos kcal,	unsaturated	40,6g/dia	Waist circunference (cm)	16	35	87.5	5.8	NI	NI	32	35	87.1	6.4	NI	NI		Sem diferença intragrupo (18 semanas x baseline)
Lee et al, 2018 b												6	food		Olive oil	Extra virgin oil - As dietas de testetinha 2,000 kcal, com 30% kcal gordura total (sendo 20% das kcal da gordura de teste), 15% proteína kcal e 55% de carboidratos kcal,	39,6g/dia	39.6	Coconut oil	As dietas de teste tinham 2,000 kcal, com 30% kcal gordura total (sendo 20% das kcal da gordura de teste), 15% proteína kcal e 55% de carboidratos kcal,	saturated	40,6g/dia	Waist circunference (cm)	16	35	87.5	5.8	NI	NI	32	35	86.2	6.2	NI	NI
Loganathan et al, 2022 a												4	food		Extravirgin olive oil	SFA 16,89% / MUFA 72,36% / PUFA 10,76%	36,2 g	36.2	Palm oil	SFA 39,76% / MUFA 47,64% / PUFA 12,61%	saturated	36,2g	Waist circumference	20	44	78.33	7.82	NI	NI	40	44	78.97	6.93	NI	NI	NI
Loganathan et al, 2022 b												4	food		Extravirgin olive oil	SFA 16,89% / MUFA 72,36% / PUFA 10,76%	36,2 g	36.2	Cocoa butter	SFA 63,32% / MUFA 33,34% / PUFA 3,33%	saturated	36,2g	Waist circumference	20	44	78.33	7.82	NI	NI	40	44	78.55	7.88	NI	NI
López-Plaza et al, 2013	2013	Effects of milk supplementation with conjugated linoleic acid on weight control and body composition in healthy overweight people,	NCT01503047	parallel	Spain	42	Subjects with overweight	44 + 8	28,49 ± 1,0	10	23.8	24	food	to examine the effects and safety of 3 g of a 1:1 mix of c9-t11 and t10-c12 on weight control and body composition in healthy overweight individuals,	Olive oil	Olive oil + 200 mL skimmed milk	3g/dia	3	CLA	CLA + 200 ml skimmed milk	unsaturated	3g/dia	Waist cincunference (cm)	16	20	91	5.52	-0.46	3.88	22	22	90.65	9.84	-2.6	4.43	Redução significativa no grupo CLA	Com diferença intragrupo (24 semanas x baseline)
Nigam et al, 2014 a												24	food		Olive oil	Olive oil	18g/dia	18	canola oil	Canola oil	unsaturated	18,4g/dia	Waist circumference (cm)	15	30	90.7	5.1	-2.9	NI	30	33	92.9	8.1	-2.3	NI		Sem diferença intragrupo (24 semanas x baseline)
Nigam et al, 2014 b												24	food		Olive oil	Olive oil	18g/dia	18	control (soyabean/safflower oil)	soyabean + safflower oil	unsaturated	18,4g/dia	Waist circumference (cm)	15	30	90.7	5.1	-2.9	NI	30	30	91.9	6.7	-2	NI
Noroozi et al., 2012												4	capsule		Olive oil	Low calorie diet + olive oil	30 g/day	30	Control	Low calorie diet	NI	Low calorie diet	Waist circumference (cm)	29	29	108.2	15.8	-4.8	NI	27	29	104.2	14.3	-4.2	NI
Oliveira et al, 2017 a												13	food		Olive oil	Olive oil	27g/dia	27	Flaxseed oil	Flaxseed oil	unsaturated	27,9g/dia	Waist circumference (cm)	12	24	99.6	25.5	-5.44	NI	26	NI	111.9	11.7	2.42	NI		SEm diferença intragrupo (12 semanas x baseline)
Oliveira et al, 2017 b												13	food		Olive oil	Olive oil	27g/dia	27	Sunflower oil	Sunflower oil	unsaturated	27,6g/dia	Waist circumference (cm)	12	24	99.6	25.5	-5.44	NI	26	NI	108.5	7.63	0.4	NI
Ornella et al, 2019												16	food		Olive oil	LOVe diet + extra-virgin olive oil	46g/dia	46	omega 3	LOVe diet + flaxseed oil, wlnusts and almonds	unsaturated	23g / dia	waist circumference (cm)	22	28	86.3	7.6	-7.9	3.6	18	26	88.7	8.8	-7.3	4		Sem diferença intragrupo (16 semanas x baseline)
Park et al, 2008												8	capsule		Olive oil + AF (3 x/sem)	olive oil	2,4g/dia	2.4	CLA + AF (3 x/sem)	CLA (mixture containing 36,9% of cis-9, trans-11 and 37,9% of trans-10, cis-12)	unsaturated	2,4g/dia	Waist cincunference (cm)	15	15	83.1	8.52	-0.82	3.21	15	15	83.3	8.13	-0.25	3.44		Sem diferença intragrupo (8 semanas x baseline)
Parker et al, 2019												12	capsule		Olive oil	Olive oil	2g/dia	2	Fish oil	fish oil (total daily dose: 1728 mg marine triglycerides, of which 588 mg EPA and 412 mg DHA, combined with 200 mg antioxidant, coenzyme Q10)	unsaturated	2g/dia	Waist circumference (cm)	25	25	100.9	9.85	-0.1	3.5	25	25	99	8.13	-0.9	3
Pérez et al, 2016 a												48	food		Olive oil	MedDiet + extra-virgin olive oil	128,5g/dia	128.5	Nuts	MedDiet + mixed nuts 30 g/day (15 g walnuts, 7,5 g hazelnuts, and 7,5 g almonds)	unsaturated	30g/dia	waist (cm)	56	117	99.2	9.85	-1.1	0.58	102	117	100.3	8.13	-2.3	0.58	Reduções significativas no grupo azeite e controle E NUTS	Com diferença intragrupo (48 semanas x baseline)
Pérez et al, 2016 b												48	food		Olive oil	MedDiet + extra-virgin olive oil	128,5g/dia	128.5	Control	Advice to a low-fat diet	NI	NI	waist (cm)	56	117	99.2	9.85	-1.1	0.58	98	117	100	8.13	-3.1	0.63
Pintó et al, 2019 a	2019	A Mediterranean Diet Rich in Extra-Virgin Olive Oil Is Associated with a Reduced Prevalence of Nonalcoholic Fatty Liver Disease in Older Individuals at High Cardiovascular Risk,	PREDIMED - ISRCTN35739639	parallel	Spain	109	Men and women at high cardiovascular risk (diabetes type 2 or > 3 cardiovascular risk factors)	64,3 ± 5,6	28,9 + 0,71	63	63	144	food	The associations with liver steatosis of 3 different diets: a MedDiet + extra-virgin olive oil (EVOO), MedDiet + nuts, or a control diet,	Olive oil	MedDiet + extra-virgin olive oil	128,5g/dia	128.5	Nuts	MedDiet + mixed nuts 30 g/day (15 g walnuts, 7,5 g hazelnuts, and 7,5 g almonds)	unsaturated	30g/dia	Waist circumference (cm)	17	34	100.3	9.85	− 2,7	1.14	36	36	100.9	8.13	− 0,1	1.63	Reduçao significativa no grupo azeite de oliva	Com diferença intragrupo (144 semanas x baseline)
Pintó et al, 2019 b												144	food		Olive oil	MedDiet + extra-virgin olive oil	128,5g/dia	128.5	Control	Advice to a low-fat diet	NI	NI	Waist circumference (cm)	17	34	100.3	9.85	− 2,7	1.14	30	30	103	8.13	0	1.45
Prater et al, 2022												8	food		Olive oil	Azeite de oliva extravirgem em 2 refeições/dia	30% das calorias	NI	Óleo de algodão	Óleo de algodão em 2 refeições/dia	unsaturated	20% das calorias	Waist circumference	22	27	91.3	15	0.4	NI	21	22	92.3	14.66	1.2	NI	NI
Rezaei et al, 2019												12	food		Olive oil	Low calorie diet + exercise + olive oil	20 g/dia	20	Sunflower oil	Low calorie diet + exercise + sunflower oil	unsaturated	20 g/dia	waist circumference (cm)	26	32	96.2	10.2	-8.6	5.3	28	34	92.3	9.7	-7.4	3.8	Redução no grupo azeite e no sunflower (baseline x final)	Com diferença intragrupo (12 semanas x baseline)
Risérus et al, 2004												12	capsule		Olive oil	olive oil; 83% triacylglycerol	3g/dia	3	CLA	(6 capsules/d; 1% of total energy intake) as c9,t11 CLA (83% triacylglycerol)	NI	3g/dia	waist circumference (cm)	12	12	114.69	9.85	0.49	2.5	13	13	112.14	8.13	-0.06	2		Sem diferença intragrupo (12 semanas x baseline)
Sales et al, 2005 a												8	food		Olive oil	Olive oil+milkshake	50,4g/dia	50.4	Peanut oil	Peanut oil+milkshake	unsaturated	51,5g/dia	waist	3	8	76.2	9.85	2.2	NI	8	8	79	8.13	5	NI
Sales et al, 2005 b												8	food		Olive oil	Olive oil+milkshake	50,4g/dia	50.4	Safflower oil	Sanfflower oil+milkshake	unsaturated	51,5g/dia	waist	3	8	76.2	9.85	2.2	NI	8	8	83.2	8.13	1.5	NI
Sales et al, 2005 c												8	food		Olive oil	Olive oil+milkshake	50,4g/dia	50.4	Controle	Controle	NI	Não recebeu milkshake	waist	2	8	76.2	9.85	2.2	NI	8	8	75.2	8.13	0.1	NI
Spriet et al, 2015												12	capsule		Olive oil	Organic olive oil	3g/dia	3	Fish oil	Omega-3 Complete, Jamieson Laboratories Ltd,, Windsor, ON, CA) administrado em 5 cápsulas, com cada cápsula fornecendo 400 mg de EPA e 200 mg de DHA	unsaturated	5g/dia	waist circumference (cm)	12	12	90.2	2.7	-1.2	NI	12	12	92.1	2.9	-0.5	NI		Sem diferença intragrupo (12 semanas x baseline)
Sravrinou et al, 2020												24	food		Olive oil	Virgin olive oil	18g/dia	18	Omega 3 and omega 6	Omega 3, omega 6, vitamin A, vitamin Eand gama tocopherol	unsaturated	20g/dia	Circunferência de cintura (cm)	18	23	107	13.2	-0.9	NI	18	23	100.1	11.7	-2.9	NI
St- Onge et al, 2008												16	food		Olive oil	Low calorie diet + Olive oil	18-24g / dia (18g M e 24g H)	18	Low calorie diet + MCT oil	MCT oil (100%)	saturated	18-24g / dia (18g M e 24g H)	waist circumference (cm)	15	24	92.1	2.71	-2.5	3.09	16	25	92.2	2.8	-2.4	3.2		Sem diferença intragrupo (16 semanas x baseline)
Syvertsen et al, 2007												24	capsule		Olive oil	Olive oil	4,5 g/dia	4.5	CLA	37,5% cis-9 trans-11 and 38% trans-10 cis-12	unsaturated	3,4 g/dia	Waist circumference (cm)	17	23	98	9.85	-1.5	1.27	24	26	99	8.13	-2	1.27	redução na porcentagem de gordura corporal no grupo CLA (baseline x 6 meses)	Com diferença intragrupo (24semanas x baseline)
Taylor et al, 2006												12	capsule		Olive oil	Olivel oil	4,5 g/day	4.5	CLA	CLA mixture	unsaturated	4,5 g/day	Waist cincunference (cm)	19	19	111.7	9.85	-0.3	2.1	21	21	112.5	8.13	0.5	2.5		Sem diferença intragrupo (12 semanas x baseline)
