# Supplementary material for: Olive oil and body fat: a systematic review withmeta-analysis
Source: Royal Society of Chemistry journal article supplement (doi:10.1039/d3fo00488k), 2023-01-01
Supplement: d3fo00488k4.xlsx [file d3fo00488k4.xlsx]

## Sheet: Planilha1
Author	Ano	Nome do artigo	nº registro clinical trials	Parallel or Crossover	País	n total	caracteríticas da população	idade (média ± DP) se min e max descrever	IMC (média ± DP) se min e max descrever	Sexo masculino (n)	Sexo masculino (%)	Tempo de intervenção (semanas) 1mês = 4 semans	vehicule	objetivo do estudo	intervenção A	Descrição da intervenção A	Quantidade intervenção A	Dose	intervenção B	type	Descrição da intervenção B	Quantidade intervenção B	Desfecho (ex,: peso, IMC, % GC total, %GC em diferentes regiões, CC, RCQ)	n_final_intervA	n_randomizado_A	media_finalA	SD_finalA	Delta A (final - inicial)	SD delta A	n_final_intervB	n_randomizado_B	media_finalB	SD_finalB	Delta B (final - inicial)	SD delta B	Outra forma de resultado ex,: % que ganhou peso; RR ou OR, etc,	Observação dados disponíveis (erro padrão da média ou do delta, IC 95% da média ou delta, valor p da diferença pré e pós intervenção de cada braço, gráfico com média ou deltas)
Arpón et al, 2018 a	2018	Impact of Consuming Extra-Virgin Olive Oil or Nuts within a Mediterranean Diet on DNA Methylation in Peripheral White Blood Cells within the PREDIMED-Navarra Randomized Controlled Trial: A Role for Dietary Lipids	PREDIMED - ISRCTN35739639	parallel	Spain	36	Men and women at high cardiovascular risk (diabetes type 2 or > 3 cardiovascular risk factors)	63,66 ± 2,70	27,76 ± 2,18	18	50	240	Alimento	Analyse whether an intervention with two Mediterranean diets, one rich in extra-virgin olive oil (MedDiet + EVOO) and the other one in nuts (MedDiet + nuts), was influencing the methylation status of peripheral white blood cells (PWBCs) genes,	Olive oil	MedDiet + extra-virgin olive oil	128,5g/dia	128.5	Nuts	unsaturated	MedDiet + mixed nuts 30 g/day (15 g walnuts, 7,5 g hazelnuts, and 7,5 g almonds)	30g/dia	BMI (kg/m2)	6	12	28.3	1.8	0.9	NI	12	12	28.8	1.8	0.7	NI		Sem diferença significativa entre e intra grupos (240 semanas x baseline),
Arpón et al, 2018 b													Alimento		Olive oil	MedDiet + extra-virgin olive oil	128,5g/dia	128	Control		Advice to a low-fat diet	NI	BMI (kg/m2)	6	12	28.3	1.8	0.9	NI	12	12	27.4	2.9	0.1	NI
Atefi et al, 2018 a													alimento		Olive oil	Balanced diet + OO	30 g/dia	30	Sunflower oil	unsaturated	Balanced diet + sunflower oil (SFO),	30 g/ dia	BMI (kg/m²)	13	27	28.6	4.9	-0.1	NI	25	27	28	3.7	-0.1	NI
Atefi et al, 2018 b	2018	Canola oil and olive oil impact on lipid profile and blood pressure in women with type 2 diabetes: a randomized, controlled trial	IRCT2015062722818N1	Parallel	Iran	81	Adults and elderly women with type 2 diabetes	58 ± 6,03	28,56 ± 4,06	0	0	8	alimento	to compare the effects of CO and OO on serum lipids and blood pressure in women with type 2 diabetes	Olive oil	Balanced diet + OO	30 g/dia	30	Canola oil	unsaturated	Balanced diet + Canola oil	30g / dia	BMI (kg/m²)	13	27	28.6	4.9	-0.1	NI	26	27	28.9	3.7	0	NI		Sem diferença entre os grupos (8 semanas x baseline)
Berven et al, 2000	2000	Safety of conjugated linoleic acid (CLA) in overweight or obese human volunteers,	NI	Parallel	Norway	60	Healthy adults with overweight or obesity	47,08 ± 6,99	29,72 ± 2,42	30	50	12	cápsula	to examine safety of conjugated linoleic acid (CLA) in overweight or obese human volunteers, The effect of CLA on body composition was also investigated,	Olive oil	Olive oil	4,5g/dia	4.5	CLA	unsaturated	CLA+750 mg safflower oil	3,4 g/dia	BMI (kg/m2)	22	30	30	2.2	-0.1	0.6	25	30	29.1	2.6	-0.4	0.6		Sem diferença intragrupo (12semanas x baseline)
Blankson et al, 2000 a	2000	Conjugated Linoleic Acid Reduces Body Fat Mass in Overweight and Obese Humans	NI	Parallel	Norway	60	Healthy subjects with overweight or obesity	45,47 ± 12,04	29,12 ± 2,63	20	33.3	12	cápsula	To investigate the dose-response relationships of conjugated linoleic acid with regard to body fat mass in humans	Olive oil	Olive oil	9g/dia	9	CLA 1,7 g	unsaturated	CLA 1,7g	1,7 g/day	BMI (kg/m²)	2	12	28.6	2.6	0.5	0.7	11	12	29.8	2.3	-0.1	0.9	redução significativa na BFM nos grupos tratados com CLA 3,4g e 6,8g em comparação com o grupo azeite,	Sem diferença intragrupo (12 semanas x baseline)	Significativa redução de body fat mass (BFM) nos grupos CLA 3,4 g e 6,8 g em comparação com o azeite,
Blankson et al, 2000 b	2000	Conjugated Linoleic Acid Reduces Body Fat Mass in Overweight and Obese Humans	NI	Parallel	Norway	60	Healthy subjects with overweight or obesity	45,47 ± 12,04	29,12 ± 2,63	20	33.3	12	cápsula	To investigate the dose-response relationships of conjugated linoleic acid with regard to body fat mass in humans	Olive oil	Olive oil	9g/dia	9	CLA 3,4 g	unsaturated	CLA 3,4 g	3,4 g/day	BMI (kg/m²)	2	12	28.6	2.6	0.5	0.7	7	12	27.1	1.9	-0.2	0.5
Blankson et al, 2000 c	2000	Conjugated Linoleic Acid Reduces Body Fat Mass in Overweight and Obese Humans	NI	Parallel	Norway	60	Healthy subjects with overweight or obesity	45,47 ± 12,04	29,12 ± 2,63	20	33.3	12	cápsula	To investigate the dose-response relationships of conjugated linoleic acid with regard to body fat mass in humans	Olive oil	Olive oil	9g/dia	9	CLA 5,1 g	unsaturated	CLA 5,1 g	5,1 g/day	BMI (kg/m²)	2	12	28.6	2.6	0.5	0.7	11	12	29.4	2.7	0	0.3
Blankson et al, 2000 d	2000	Conjugated Linoleic Acid Reduces Body Fat Mass in Overweight and Obese Humans	NI	Parallel	Norway	60	Healthy subjects with overweight or obesity	45,47 ± 12,04	29,12 ± 2,63	20	33.3	12	cápsula	To investigate the dose-response relationships of conjugated linoleic acid with regard to body fat mass in humans	Olive oil	Olive oil	9g/dia	9	CLA 6,8 g	unsaturated	CLA 6,8 g	6,8 g/day	BMI (kg/m²)	2	12	28.6	2.6	0.5	0.7	10	12	30.2	2.8	-0.3	0.7
Cândido et al, 2007	2017	Consumption of extra virgin olive oil improves body composition and blood pressure in women with excess body fat: a randomized, double‐blinded, placebo‐controlled clinical trial	RBR-7z358j	Parallel	Brazil	61	Women with oveerweight or obesity	27,0 + 24,8	30,10 ± 2,7	0	0	9	alimento	to investige the efects of energy-restricted diet containing EVOO on body composition and metabolic disruptions related to obesity,	Olive oil	Extra virgin olive oil	22,5g/dia	22.5	control	NI	Soybean Oil	23,2g/dia	BMI (kg/m²)	21	33	28.9	3.78	-1.06	0.67	20	28	29.06	3.3	-0.64	0.78		Sem diferença intragrupo (9 semanas x baseline)
Ciccone et al, 2014 a	2014	Endothelial Function in Obese and Overweight Patients: The Role of Olive Oil, Fish and Nuts,	PREDIMED	Parallel	Italy	47	Subjects with owerweight or obesity and cardiovascular disease	54 ± 11	33,9 ± 5,1	24	51.06	60	alimento	Avaliar o efeito do azeite de oliva, peixe não frito e nozes na função endotelial em pacientes com sobrepeso / obesos,	Olive oil	healthy diet + olive oil	36g/dia	36	non-fried fish	unsaturated	healthy diet enriched with non-fried fish	3 portion/week	BMI (kg/m²)	3	8	31.6	4.1	-4.4	NI	8	8	33.3	4.2	0.2	NI	Circunferência da cintura, índice de massa corporal diminuiu significativamente	Com diferença intragrupo (18 semanas x baseline)
Ciccone et al, 2014 b													alimento		Olive oil	healthy diet + olive oil	36g/dia	36	Nuts	unsaturated	Healthy diet + nuts	60g/dia	BMI (kg/m²)	3	8	31.6	4.1	-4.4	NI	7	7	30.9	3.9	0.6	NI
Ciccone et al, 2014 c													alimento		Olive oil	healthy diet + olive oil	36g/dia	36	Control	NI	Healthy diet	NI	BMI (kg/m²)	2	8	31.6	4.1	-4.4		24	24	31.9	3.6	-1	NI
Derouiche et al, 2012	2012	Effect of Argan and Olive Oil Consumption on the Hormonal Profile of Androgens Among Healthy Adult Moroccan Men,	NI	Parallel	Marocco	60	Healthy men	23,42 ± 3,85	21,95 ± 2,2	60	100	3	alimento	to assess the effect of virgin argan oil (VAO) and extra virgin olive oil (EVO) on the hormonal profile of androgens and anthropometric parameters	Olive oil	Extra virgin olive oil	22,5g/dia	22.5	Control	NI	Argan oil	22,7g/dia	BMI (kg/m²)	30	30	22.5	2.5	0.2	NI	30	30	21.7	1.9	0.1	NI		Sem diferença intragrupo (3 semanas x baseline)
Félix-Soriano et al, 2021 a	2021	Effects of DHA-Rich n-3 Fatty Acid Supplementation and/or Resistance Training on Body Composition and Cardiometabolic Biomarkers in Overweight and Obese Post-Menopausal Women	NCT03300388	Parallel	Spain	71	Mulheres em pós-menopausa com IMC entre 27,5 - 35 kg/m²	58,28 ± 2,27	30,61 ± 1,73	0	0	16 semanas	cápsula	Verificar se a suplementação com óleo de peixe rico em DHA e o treino de resistência, sozinhos ou em combinação, podem beneficiar efeitos na composição corporal	Olive oil	6 cápsulas de 0,5 g	3 g	3	Ômega-3	unsaturated	Concentrado de óleo de peixe rico em DHA, 1650 mg/dia de DHA e 150 mg/dia de EPA, totalizando 1950 mg/dia de PUFA	3 g	BMI	10	21	29.18	3.78	-1.07	1.16	7	21	29.36	3.3	-1.03	0.94
Félix-Soriano et al, 2021 b	2021	Effects of DHA-Rich n-3 Fatty Acid Supplementation and/or Resistance Training on Body Composition and Cardiometabolic Biomarkers in Overweight and Obese Post-Menopausal Women	NCT03300388	Parallel	Spain	71	Mulheres em pós-menopausa com IMC entre 27,5 - 35 kg/m²	58,28 ± 2,27	30,61 ± 1,73	0	0	16 semanas	cápsula		Olive oil	6 cápsulas de 0,5 g	3 g	3	Olive oil + resistance training		6 cápsulas seguidas de programa progressivo de treino de resistência (2x/semana)	3 g	BMI	10	21	29.18	3.78	-1.07	1.16	8	22	30.01	3.3	-1.06	1.34
Félix-Soriano et al, 2021 c	2021	Effects of DHA-Rich n-3 Fatty Acid Supplementation and/or Resistance Training on Body Composition and Cardiometabolic Biomarkers in Overweight and Obese Post-Menopausal Women	NCT03300388	Parallel	Spain	71	Mulheres em pós-menopausa com IMC entre 27,5 - 35 kg/m²	58,28 ± 2,27	30,61 ± 1,73	0	0	16 semanas	cápsula											10	21	29.89	3.3	-0.9	0.94	8	21	29.36	3.3	-1.03	0.94
Félix-Soriano et al, 2021 d	2021	Effects of DHA-Rich n-3 Fatty Acid Supplementation and/or Resistance Training on Body Composition and Cardiometabolic Biomarkers in Overweight and Obese Post-Menopausal Women	NCT03300388	Parallel	Spain	71	Mulheres em pós-menopausa com IMC entre 27,5 - 35 kg/m²	58,28 ± 2,27	30,61 ± 1,73	0	0	16 semanas	cápsula		Olive oil	6 cápsulas de 0,5 g	3 g	3	DHA-rich fish oil concentrate + resistance training	unsaturated	6 cápsulas seguidas de programa progressivo de treino de resistência (2x/semana)	3 g	BMI	10	21	29.89	3.3	-0.9	0.94	8	22	30.01	3.3	-1.06	1.34
Foshati et al, 2021	2021	The effect of extra virgin olive oil on anthropometric indices, lipid profile, and markers of oxidative stress and inflammation in patients with depression, a double-blind randomised controlled trial	IRCT2016041820140N3	Parallel	Iran	62	Patients with depression	42,2 ± 11,56	26,2 ± 5,19	18	0.29	7,4 semanas	Alimento	O efeito do azeite de oliva extravirgem no peso, circunferência de cintura e risco cardiovascular em pacientes com depressão	Extravirgin olive oil	Azeite de oliva extravirgem como alimento durante 52 dias	22,5 g	22.5	Sunflower oil	unsaturated	Óleo de girassol como alimento por 52 dias	22,7 g	BMI	27	31	25.5	6	-0.16	0.49	28	31	26.6	4.1	-0.2	0.53	NI
Gammelmark et al, 2012													NI		Olive oil	olive oil	2 g/dia	2	Control	NI	fish oil	2 g / dia (640 mg eicosapentaenoic acid [EPA] and 480 mg doco- sahexaenoic acid [DHA])	BMI Kg/m²	25	25	30.75	4.21	-0.07	NI	24	25	29.54	3.13	0.01	NI		Sem diferença intragrupo (6 semanas x baseline)
Gaullier et al, 2004 a	2004	Conjugated linoleic acid supplementation for 1 y reduces body fat mass in healthy overweight humans	NI	Parallel	Norway	180	Healthy subjects with overweight	45,83 ± 10,38	28,03 ± 1,61	31	17.22	48	cápsula	The objective of the study was to ascertain the 1-y effect of CLA on body composition and safety in healthy overweight adults consuming an ad libitum diet,	Olive oil	Olive oil	4,5g/dia	4.5	CLA-FFA	unsaturated	80% CLA-FFA (3,6 g active CLA isomers,)	4,5 g/dia	BMI (kg/m²)	30	59	27.7	1.8	0	1	61	61	27.7	1.7	-0.4	1.2	redução do imc no grupo CLA FFA	Com diferença intragrupo (8 semanas x baseline)
Gaullier et al, 2004 b													cápsula		Olive oil	Olive oil	4,5g/dia	4.5	CLA-Tri	unsaturated	76% CLA-triacylglycerol (3,4 g active isomers, n 60),	4,5 g/dia	BMI (kg/m²)	29	59	27.7	1.8	0	1	60	60	27.6	1.6	-0.6	1.2
Green et al, 2020	2020	Hepatic de novo lipogenesis is suppressed and fat oxidation is increased by omega-3 fatty acids at the expense of glucose metabolism,	NCT01936779	Parallel	UK	47	Helathy men	45 ± 16,2	28,2 ± 8,5	47	1	8	cápsula	to investigate the effects of omega-3 FA supplementation on hepatic DNL and FA oxidation using a combination of human in vivo and in vitro studies,	Olive oil	Olive oil	4g/dia	4	omega 3	unsaturated	4 g/day (a total of 1,84g EPA+1,52g DHA/day)	4g/dia	BMI (kg/m²)	19	23	27.8	9.62	0.2	NI	19	24	28.7	7.92	0.2	NI		Sem diferença intragrupo (8 semanas x baseline)
Guesdon et al, 2018 a	2018	Effects of fish oils on ex vivo B-cell responses of obese subjects upon BCR/TLR stimulation: a pilot study	NI	Parallel	USA	36	Subjects with obesity	42.49	38,57 ± 8,7	16	44.4	12	cápsula	test how n-3 LC-PUFAs influence B-cell responses of obese humans,	Olive oil	Olive oil	4 g/dia	4	Fish oil	unsaturated	fish oil concentrated (400 mg EPA/ 300 mg DHA - 4 x dia)	4g/dia	BMI (kg/m²)	6	12	38.7	10.7	-0.7	NI	12	12	40	9.35	-0.15	NI		Sem diferenças significativas (12 semanas x baseline)
Guesdon et al, 2018 b													cápsula		Olive oil	Olive oil	4 g/dia	4	High-DHA fish oil concentrate	unsaturated	high-DHA-FO concentrate (100 mg EPA/ 300mg DHA - 4 x dia)	4g/dia	BMI (kg/m²)	6	12	38.7	10.7	-0.7	NI	10	12	35.6	4.11	-0.12	NI
Kabiri et al, 2017	2017	Impact of olive oil-rich diet on serum omentin and adiponectin levels: a randomized cross-over clinical trial among overweight women,	IRCT10265	Crossover	Iran	26	Women with overweight	34,8 ± 7,9	27,6 ± 2	0	0	6	alimento	to investigate the effect of olive oil-rich diet on omentin and adiponectin concentrations,	Olive oil	Extra Virgin olive oil	32g/dia	0.32	Usual diet	NI	Usual diet 15% of energy from protein, 51% from carbohydrate, 34% from total fat (16% saturated fatty acid, 8% monounsaturated fatty acid, and 10% polyunsaturated fatty acid),	-	BMI (kg/m²)	17	26	26.7	0.5	-1.1	0.2	17	26	26.7	0.5	-0.93	0.2	Imc diminuiu nos dois grupos (baseline x final)	Com diferença intragrupo (6 semanas x baseline)
Khani et al, 2021	2021	Omega‐3 supplementation effects on polycystic ovary syndrome symptoms and metabolic syndrome,	NI	Parallel	Iran	88	Women with polycystic ovary syndrome	30,12 ± 5,99	31,8 ± 3,58	0	0	24	Cápsula	The effect of omega‐3 supplementation on PCOS symptoms and metabolic syndrome,	Olive oil	Olive oil	2 g/day	2	Ômega-3	unsaturated	Ômega-3	2g/day (180 mg EPA + 120 mg DHA)	BMI (kg/m²)	44	44	31.61	3.57	-0.18	NI	43	¨44	30.08	3.39	-1.72	NI		Sem diferença entre grupos no baseline, Redução significativa do IMC e na circunferência de cintura no grupo do ômega-3 em relação ao azeite de oliva após o tratamento, Não houve diferença significativa na circunferência de quadril,
Khaw et al, 2018 a													NI		Olive oil	Extra virgin olive oil	50g/dia	50	Coconut oil	saturated/trans	Extra virgin coconut oil	50g/dia	BMI (kg/m2)	15	33	24.9	3.78	-0.01	0.29	28	30	26.4	3.3	0.09	0.27		Sem diferença intragrupo (4 semanas x baseline)
Khaw et al, 2018 b													NI		Olive oil	Extra virgin olive oil	50g/dia	50	Butter	saturated/trans	Butter	50g/dia	BMI (kg/m2)	15	33	24.9	3.78	-0.01	0.29	33	33	25	3.3	0.02	0.35
Kontogianni et al, 2013	2013	Flaxseed oil does not affect inflammatory markers and lipid profile compared to olive oil, in young, healthy, normal weight adults	NI	Crossover	Greece	53	Healthy subjects	25,6± 5,9	21,9± 2,5	8	21.6	6	alimento	to explore whether diet's enrichment with FO could beneficially alter inflammatory markers and lipid profile, compared to OO	Olive oil	(Chorio extra virgin olive oil, Minerva; 0,13 g ALA, 11,3 g oleic) acid)	13,5g/dia	13.5	Flaxseed oil	unsaturated	(Organic Flax oil, Flora; 8 g ALA, 3 g oleic acid)	13,9g/dia	BMI (kg/m²)	37	54	21.8	2.6	-0.2	NI	37	37	22	2.6	0.1	NI	Diferença no grupo azeite d eoliva	Com diferença intragrupo no olive oil (6 semanas x baseline)
Kruse et al, 2020	2020	Dietary Rapeseed Oil supplementation Reduces Hepatic Steatosis in Obese Men - A randomized controlled trial	NCT02458586	parallel	Germany	27	Men with overweight or obesity	56,3 ± 11,45	32,46 ± 3,77	27	100	8	Alimento	Analyze the influence of a daily nutritional supplementation of MUFA and PUFA to an isocaloric diet on body composition, serum lipids, serum liver enzymes, and inflammatory gene expression in subcutaneous (s, c,) adipose tissue as primary outcome variables in moderately obese men,	Olive oil	Refined olive oil	45g/dia	45	Rapessed oil	unsaturated	Refined rapessed/Canola oil	46g/dia	BMI (kg/m²)	11	11	33.2	1.65	0.1	NI	15	16	31.7	0.7	-0.3	NI		Sem diferença intragrupo (8 semanas x baseline)
Lee et al, 2018 a	2018	Effects of palm-based high-oleic blended cooking oil diet on selected biomarkers of inflammation and obesity compared to extra virgin olive oil diet in overweight malaysian adults,	NCT02245113	Crossover	Malaysia	35	Healthy subjects with overweight	30,3 ± 8,1	25,5 ± 1,7	13	40.62	6	Alimento	To studie the effects of HOBO on human health is limited and therefore, this study compared the effects of HOBO, extra virgin olive oil (OO) and coconut oil (CO) on biomarkers of inflammation, obesity and blood pressure	Olive oil	Extra virgin oil - As dietas de testetinha 2,000 kcal, com 30% kcal gordura total (sendo 20% das kcal da gordura de teste), 15% proteína kcal e 55% de carboidratos kcal,	39,6g/dia	39.6	High-oleic blended cooking oil	unsaturated	As dietas de teste tinham 2,000 kcal, com 30% kcal gordura total (sendo 20% das kcal da gordura de teste), 15% proteína kcal e 55% de carboidratos kcal,	40,6g/dia	BMI (kg/m²)	16	35	25.52	1.64	0	NI	32	35	25.64	1.69	0.1	NI		Sem diferença intragrupo (18 semanas x baseline)
Lee et al, 2018 b													Alimento		Olive oil	Extra virgin oil - As dietas de testetinha 2,000 kcal, com 30% kcal gordura total (sendo 20% das kcal da gordura de teste), 15% proteína kcal e 55% de carboidratos kcal,	39,6g/dia	39.6	Coconut oil	saturated/trans	As dietas de teste tinham 2,000 kcal, com 30% kcal gordura total (sendo 20% das kcal da gordura de teste), 15% proteína kcal e 55% de carboidratos kcal,	40,6g/dia	BMI (kg/m²)	16	35	25.52	1.64	0	NI	32	35	25.58	1.78	0.08	NI
Loganathan et al, 2022 a	2022	Diets enriched with palm olein, cocoa butter, and extra virgin olive oil exhibited similar lipid response: a randomized controlled study in young healthy individuals	NCT02802904	Crossover	Malasya	40	Healthy subjects	33,68 ± 4,82	21,67 ± 3,82	6	0.15	4	Alimento	Investigar os efeitos crônicos de dietas ricas em azeite de oliva extravirgem, óleo de palma e manteiga de cacau na resposta lipídica	Extravirgin olive oil	SFA 16,89% / MUFA 72,36% / PUFA 10,76%	36,2 g	36.2	Palm oil	saturated/trans	SFA 39,76% / MUFA 47,64% / PUFA 12,61%	36,2g	BMI	20	44	22.29	2.87	0.67	-0.94	40	44	22.28	2.84	NI	NI	NI
Loganathan et al, 2022 b													Alimento		Extravirgin olive oil	SFA 16,89% / MUFA 72,36% / PUFA 10,76%	36,2 g	36.2	Cocoa butter	saturated/trans	SFA 63,32% / MUFA 33,34% / PUFA 3,33%	36,2g	BMI	20	44	22.29	2.87	0.67	-0.94	40	44	22.22	2.84	NI	NI
López-Plaza et al, 2013													NI		Olive oil	Olive oil + 200 mL skimmed milk	3g/dia	3	CLA	unsaturated	CLA + 200 ml skimmed milk	3g/dia	BMI (kg/m²)	16	20	28.51	1.29	-0.21	0.81	22	22	27.81	1.43	-0.53	1.06	Redução significativa no grupo CLA	Com diferença intragrupo (24 semanas x baseline)
Lucci et al, 2016	2016	Palm oil and cardiovascular disease:a randomized trial of the effects of hybrid palm oil supplementation on human plasma lipid patterns,	NI	Parallel	Colombia	160	Alduts and elderly with overweight or obesity	63,5 ± 7,2	28,3 ± 3,8	13	8.1	12	alimento	to examine the effect of hybrid Elaeis oleifera × E, guineensis palm oil sup-supplementation on human plasma lipids related to CVD risk factors,	Olive oil	Extra virgin olive oil	22,5g/dia	22.5	Palm oil	saturated/trans	Hybrid palm oil rich diet	22,5g/dia	BMI (kg/m2)	77	82	27.7	4.1	-0.4	NI	68	78	28.3	3.3	-0.2	NI		Sem diferença intragrupo (12semanas x baseline)
Nigam et al, 2014 a	2014	Effect of a 6-Month Intervention with Cooking Oils Containing a High Concentration of Monounsaturated Fatty Acids (Olive and Canola Oils) Compared with Control Oil in Male Asian Indians with Nonalcoholic Fatty Liver Disease	NI	Parallel	India	93	Subjects with overweight or obesity	37,16 ± 6,54	27,33 ± 3,9	93	100	24	alimento	To investigate the effects of dietary intervention with canola or olive oil in comparison with commonly used refined oil in Asian Indians with nonalcoholic fatty liver disease (NAFLD),	Olive oil	Olive oil	18g/dia	18	canola oil	unsaturated	Canola oil	18,4g/dia	BMI (kg/m²)	15	30	25.6	2.3	-1.7	NI	30	33	26.9	2.8	-0.5	NI	Diminuição do IMC no grupo azeite (0,01)	Com diferença intragrupo (24 semanas x baseline)
Nigam et al, 2014 b													Alimento		Olive oil	Olive oil	18g/dia	18	control (soyabean/safflower oil)	unsaturated	soyabean + safflower oil	18,4g/dia	BMI (kg/m²)	15	30	25.6	2.3	-1.7	NI	30	30	27.4	2.5	0	NI
Noroozi et al., 2012	2012	Effect of Olive Oil with Low Calorie Diet on Blood Lipids in Hyperlipidemic Patients	NI	Parallel	Iran	58	Subjects with oveerweight or obesity and hyperlipidemia	40,5 ± 11	33,8 ± 5,8	7	12.069	4	cápsula	To study the effect of olive oil with low-calorie diet on blood lipids in hyperlipidemic patients,	Olive oil	Low calorie diet + olive oil	30 g/day	30	Control	NI	Low calorie diet	Low calorie diet	BMI (kg/m²)	29	29	33.2	5.9	-1.6	NI	27	29	31.2	5.3	-1.6	NI		Redução significativa em ambos os grupos,	IMC, circunferência da cintura foram significativamente reduzidas (p <0,05) após 4 semanas em ambos os grupos
Oliveira et al, 2017 a	2017	Unsaturated Fatty Acids Improve Atherosclerosis Markers in Obese and Overweight Non-diabetic Elderly Patients,	NI	parallel	Brazil	79	Elderly patients with overweight or obesity and metabolic syndrome or some of its components	67,4 ± 5,16	33,55 ± 3,91	23	29.1	13	alimento	to demonstrate the effect of polyunsaturated and monounsaturated fat supplementation on the biochemical and endothelial markers of atherosclerotic disease in obese or overweight non-diabetic elderly patients,	Olive oil	Olive oil	27g/dia	27	Flaxseed oil	unsaturated	Flaxseed oil	27,9g/dia	BMI (kg/m2)	12	NI	32.9	3.41	0.2	NI	26	NI	35.5	4.81	1.1	NI		SEm diferença intragrupo (12 semanas x baseline)
Oliveira et al, 2017 b													alimento		Olive oil	Olive oil	27g/dia	27	Sunflower oil	unsaturated	Sunflower oil	27,6g/dia	BMI (kg/m2)	12	NI	32.9	3.41	0.2	NI	26	NI	33.05	2.54	-0.45	NI
Ornella et al, 2019	2019	Women in LOVe: Lacto-Ovo-Vegetarian Diet Rich in Omega-3 Improves Vasomotor Symptoms in Postmenopausal Women, An Exploratory Randomized Controlled Trial,	NCT02816814	parallel	Italy	54	Postmenopausal women with overweight or obesity	55,1 ± 5,4	30,25 ± 3,63	0	0	16	alimento	to determine the efficacy of a lacto- ovo-vegetarian (LOVe) diet rich in omega-3 fatty acids vs, a lacto-ovo-vegetarian diet rich in EVO (extra-virgin olive oil) in reducing VMS frequency in postmenopausal women,	Olive oil	LOVe diet + extra-virgin olive oil	46g/dia	46	omega 3	unsaturated	LOVe diet + flaxseed oil, wlnusts and almonds	23g / dia	BMI (kg/m2)	22	28	26.7	3.4	-3.6	1.4	18	26	27.3	3.7	-2.9	1.3		Sem diferença intragrupo (16 semanas x baseline)
Park et al, 2008	2008	Conjugated Linoleic Acid (CLA) Supplementation for 8 Weeks Reduces Body Weight in Healthy Overweight/Obese Korean Subject	NI	Parallel	Korea	30	Healthy subjects with overweight or obesity	39,7 ± 15,63	25,9 ± 3,46	3	10	8	cápsula	to determine the effect of conjugated linoleic acid (CLA) supplementation (50:50 ratio of cis-9, trans-11 and trans-10, cis-12 isomers) for 8 weeks on body composition and biochemical parameters in healthy overweight/obese	Olive oil + AF (3 x/sem)	olive oil	2,4g/dia	2.4	CLA + AF (3 x/sem)	unsaturated	CLA (mixture containing 36,9% of cis-9, trans-11 and 37,9% of trans-10, cis-12)	2,4g/dia	BMI (kg/m²)	15	15	25.9	3.87	-0.39	1.39	15	15	25.3	3.09	-0.27	0.34	No grupo CLA houve diminuição em -0,27 kg / m no IMC	Com diferença intragrupo (8 semanas x baseline)	Redução significativa do IMC e circunferência de cintura no grupo CLA, Não houve diferença no grupo OO, As mudanças (reduções) da massa gorda e da massa magra não são estatisticamente significantes,
Parker et al, 2019	2019	Effect of Fish Oil Supplementation on Hepatic and Visceral Fat in Overweight Men: A Randomized Controlled Trial	ACTRN12610000351011	Parallel	Australia	50	Healthy men with oveerweight	34,2 ± 10,6	27,9 ± 1,41	50	100	12	cápsula	The effect of supplementation with omega-3 PUFA from fish oil versus placebo on quantified liver fat, liver tests, and body composition including visceral adipose tissue (VAT)	Olive oil	Olive oil	2g/dia	2	Fish oil	unsaturated	fish oil (total daily dose: 1728 mg marine triglycerides, of which 588 mg EPA and 412 mg DHA, combined with 200 mg antioxidant, coenzyme Q10)	2g/dia	BMI (kg/m²)	25	25	28.1	3.78	0.1	1	25	25	27.7	3.3	-0.1	0.5		Redução de IMC e RCQ no grupo CLA,
Pérez et al, 2016 a	2016	influence of a Mediterranean Dietary Pattern on Body Fat Distribution: Results of the PREDIMED–Canarias Intervention Randomized Trial,	PREDIMED - ISRCTN 35739639	parallel	Spain	351	Men and women at high cardiovascular risk (diabetes type 2 or > 3 cardiovascular risk factors)	NI	31,08 ± 3,82	119	33.9	48	alimento	To assess the influence of a Mediterranean dietary pattern (MeDiet) on anthropometric and body composition parameters in one of the centers of the PREDIMED randomized dietary trial,	Olive oil	MedDiet + extra-virgin olive oil	128,5g/dia	128.5	Nuts	unsaturated	MedDiet + mixed nuts 30 g/day (15 g walnuts, 7,5 g hazelnuts, and 7,5 g almonds)	30g/dia	BMI (kg/m2)	56	117	30.1	3.78	-0.5	0.15	102	117	30.6	3.3	-0.5	0.2	Reduções significativas no grupo azeite e controle	Com diferença intragrupo (48 semanas x baseline)
Pérez et al, 2016 b													alimento		Olive oil	MedDiet + extra-virgin olive oil	128,5g/dia	128.5	Control	NI	Advice to a low-fat diet	NI	BMI (kg/m2)	56	117	30.1	3.78	-0.5	0.15	98	117	30.9	3.3	-0.4	0.17
Pintó et al, 2019 a													NI		Olive oil	MedDiet + extra-virgin olive oil	128,5g/dia	128.5	Nuts	unsaturated	MedDiet + mixed nuts 30 g/day (15 g walnuts, 7,5 g hazelnuts, and 7,5 g almonds)	30g/dia	BMi (kg/m2)	17	34	28.5	3.78	-0.2	0.2	36	36	28.5	3.3	-0.2	0.2		Sem diferença intragrupo (144 semanas x baseline)
Pintó et al, 2019 b													NI		Olive oil	MedDiet + extra-virgin olive oil	128,5g/dia	128.5	Control	NI	Advice to a low-fat diet	NI	BMi (kg/m2)	17	34	28.5	3.78	-0.2	0.2	30	30	29.6	3.3	0	0.25
Prater et al, 2022	2022	Comparison of Blood Lipid Responses to Diets Enriched with Cottonseed Oil vs. Olive Oil in Adults with High Cholesterol in a Randomized Trial	NCT04397055	Prallel	USA	43	hypercholesterolemic adults.	53 ± 10	27,6 ± 4,8	16	0.372	8	Alimento	Investigar os efeitos de uma intervenção de dieta de 8 semanas rica em óleo de semente de algodão (CSO; rico em PUFA) ou azeite de oliva (OO; rico em MUFA) nos lipídios do sangue em adultos hipercolesterolêmicos.	Olive oil	Azeite de oliva extravirgem em 2 refeições/dia	30% das calorias	30% das calorias	Óleo de algodão	unsaturated	Óleo de algodão em 2 refeições/dia	20% das calorias	BMI	22	27	28.1	5.62	0.4	NI	21	22	27.7	4.12	0.4	NI	NI
Rezaei et al, 2019	2019	Olive oil lessened fatty liver severity independent of cardiometabolic correction in patients with non-alcoholic fatty liver disease: A randomized clinical trial,	IRCT2016011825957	Parallel	Iran	66	Patients with non-alcoholic fatty liver disease and overweight or obesity	43,46 ± 11,5	30,08 ± 3,7	29	43.9	12	alimento	aimed to evaluate the effect of olive oil consumption on the severity of fatty liver and cardiometabolic markers in patients with non-alcoholic fatty liver disease,	Olive oil	Low calorie diet + exercise + olive oil	20 g/dia	20	Sunflower oil	unsaturated	Low calorie diet + exercise + sunflower oil	20 g/dia	BMI (kg/m²)	26	32	29.3	3.7	-1.3	0.88	28	34	28.7	3.9	-0.86	0.85	Redução no grupo azeite e no sunflower (baseline x final)	Com diferença intragrupo (12 semanas x baseline)
Risérus et al, 2004	2004	Effects of cis-9,trans-11 conjugated linoleic acid supplementation on insulin sensitivity, lipid peroxidation, and proinflammatory markers in obese men1–3,	NI	Parallel	Sweden	25	Men with overweight or obesity	54,96 ± 5,7	30,5 ± 2,2	25	100	12	capsula	to investige the effects of c9,t11 CLA supplementation on insulin sensitivity, body composition, and lipid peroxidation in a group at high risk for cardiovascular disease,	Olive oil	olive oil; 83% triacylglycerol	3g/dia	3	CLA	unsaturated	(6 capsules/d; 1% of total energy intake) as c9,t11 CLA (83% triacylglycerol)	3g/dia	BMI (kg/m²)	12	12	30.25	3.78	0.15	0.36	13	13	31.02	3.3	0.42	0.41	aumento significativo de IMC (kg/m2) no grupo CLA baseline x 12 semanas	Com diferença intragrupo (12 semanas x baseline)
Sales et al, 2005 a	2005	The effects of peanut, safflower, and olive oil on body composition, energy metabolism, lipid profile and food intake of eutrophic, normolipidemic subjects	NI	parallel	Brazil	32	Healthy adults with eutrophy	NI	NI	16	50	8	alimento	The effects of peanut, safflower and olive oils on the lipid profile, body composition and satiety of eutrophic, normolipidemic subjects,	Olive oil	Olive oil+milkshake	50,4g/dia	50.4	Peanut oil	saturated/trans	Peanut oil+milkshake	51,5g/dia	BMI (kg/m2)	3	8	22	3.78	0.9	NI	8	8	22.7	3.3	0.7	NI	Mediana,	Sem diferenças no baseline, Aumento significativo de % de gordura corporal e massa gorda em todos os grupos experimentais, O grupo do amendoim aumentou o peso e o IMC ao final do experimento, os grupos do açafrão e do azeite apresentaram o aumento nas primeiras 4 semanas, O grupo do azeite apresentou aumento significativo da circunferência de quadril ao final do experimento,
Sales et al, 2005 b													alimento		Olive oil	Olive oil+milkshake	50,4g/dia	50.4	Safflower oil	unsaturated	Sanfflower oil+milkshake	51,5g/dia	BMI (kg/m2)	3	8	22	3.78	0.9	NI	8	8	23.9	3.3	0.4	NI
Sales et al, 2005 c													alimento		Olive oil	Olive oil+milkshake	50,4g/dia	50.4	Controle	NI	Controle	Não recebeu milkshake	BMI (kg/m2)	2	8	22	3.78	0.9	NI	8	8	22.8	3.3	0.2	NI
Shen et al, 2018 a													cápsula		Olive oil	olive oil	0,43g/dia	0.43	Low tocotrienol oil	unsaturated	Low tocotrientol oil	0,43g /day from DeltaGold 70 containing 300 mg tocotrienol	BMI (kg/m²)	14	29	27.88	6.44	-1.07	NI	30	30	28.95	6.01	0.18	NI
Shen et al, 2018 b	2018	A 12-week evaluation of annatto tocotrienol supplementation for postmenopausal women: safety, quality of life, body composition, physical activity, and nutrient intake	NCT02058420	Parallel	USA	89	Postmenopausal women with osteopenia	59,72 ± 6,77	28,73 ± 5,72	0	0	12	cápsula	to evaluate the safety of a 12-week supplementation of annato tocotrienol in postmenopausal osteopenic women, along with effects of the supplementation on quality of life, body composition, physical activity, and nutrient intake in this population,	Olive oil	olive oil	0,43g/dia	0.43	High tocotrienol oil	unsaturated	High tocotrienol oil	0,86 g/day from DeltaGold 70 containing 600 mg tocotrienol	BMI (kg/m²)	14	29	27.88	6.44	-1.07	NI	29	30	28.37	5.28	-0.1	NI		Sem diferença intragrupo (12 semanas x baseline)
Smedman et al, 2001	2001	Conjugated Linoleic Acid Supplementation in Humans—Metabolic Effects	NI	Parallel	Sweden	53	Healthy subjects or subjects with overweight	45,1 ± 11,92	25,02 ± 4,08	27	50.9	12	Cápsula	The effects of supplementation with CLA in healthy humans on anthropometric and metabolic variables and on the fatty acid composition of serum lipids and thrombocytes,	Olive oil	Olive oil	4,2g/dia	4.2	CLA	unsaturated	capsules contained 75,9% CLA with equal amounts of the CLA isomers cis-9,trans-11 and trans-10,cis-12,	4,2g/dia	BMI (kg/m²)	24	24	24.71	3.78	0.21	NI	26	26	25.64	3.3	0.14	NI	Mudança absoluta e % de mudança,	Diferença intragrupo CLA na % gordura corporal (P = 0,0006), Diferença entre grupos % gordura corporal (P = 0,050),	redução da gordura corporal de 3,8% no grupo CLA, P = 0,0006, Obs: incluindo todos os participantes, redução da gordura corporal no grupo CLA foi de 3,7%, P <0,001 (P = 0,07)
Spriet et al, 2015	2015	Omega-3 Fatty Acid Supplementation for 12 Weeks Increases Resting and Exercise Metabolic Rate in Healthy Community- Dwelling Older Females	NCT01734538	Parallel	Canada	26	Elderly women	66,0 ± 1,0	27,1 ± 4,0	0	0	12	capsula	to evaluate the effect of fish oil (FO) supplementation in a cohort of healthy, community-dwelling older females on 1) metabolic rate and substrate oxidation at rest and during exercise; 2) resting blood pressure and resting and exercise heart rates; 3) body composition; 4) strength and physical function, and; 5) blood measures of insulin, glucose, c-reactive protein, and triglyc- erides,	Olive oil	Organic olive oil	3g/dia	3	Fish oil	unsaturated	Omega-3 Complete, Jamieson Laboratories Ltd,, Windsor, ON, CA) administrado em 5 cápsulas, com cada cápsula fornecendo 400 mg de EPA e 200 mg de DHA	5g/dia	BMI (kg/m²)	12	12	26.3	1.1	0	NI	12	12	28	1.2	0.1	NI		Sem diferença intragrupo (12 semanas x baseline)
Sravrinou et al, 2020	2020	The Effects of a 6-Month High Dose Omega-3 and Omega-6 Polyunsaturated Fatty Acids and Antioxidant Vitamins Supplementation on Cognitive Function and Functional Capacity in Older Adults with Mild Cognitive Impairment,	NI	Parallel	Cyprus	46	Older adults with mild cognitive impairment	79,3 + 7,64	33,7 + 6,9	14	38.9	24	Alimento	the effects of a high-dose omega-3 and omega-6 fatty acids supplementation, in combination with antioxidant vitamins, on cognitive function and functional capacity of older adults with mild cognitive impairment (MCI), over a 6-month period	Olive oil	Virgin olive oil	18g/dia	18	Omega 3 and omega 6	unsaturated	Omega 3, omega 6, vitamin A, vitamin Eand gama tocopherol	20g/dia	IMC (kg/m²)	18	23	33.5	7.8	-0.4	NI	18	23	33.8	6.6	-0.1	NI		Redução significativa de % de gordura corporal no grupo do ômega, Os demais parâmetros não apresentaram mudanças significativas em ambos os grupos (24 semanas x baseline),
Sun et al, 2016	2016	Effects of palm olein and olive oil on serum lipids in a Chinese population: a randomized, double-blind, cross-over trial,	ChiCTRICR-14005587	Crossover	China	120	Helthy subjects	40,29 ± 9,19	22,19 ± 2,06	48	43.6	5	alimento	to further test this hypothesis and evaluate the effects of consuming palm olein versus olive oil on serum lipid profiles in a Chinese population,	Olive oil	Olive oil	48 g/dia	48	Palm oil	saturated/trans	Palm olein	48 g/dia	BMI (kg/m²)	100	60	22.2	2.59	0.1	NI	100	60	22	1.95	-0.4	NI		Sem diferença intragrupo (10 semanas x baseline)
Syvertsen et al, 2007	2007	The effect of 6 months supplementation with conjugated linoleic acid on insulin resistance in overweight and obese,	NI	Parallel	Norway	49	Healthy adults with overweight and obesity	47.6	30.8	15	30.6	24	capsula	To evaluate if CLA as a mixture of the main isomers trans-10 cis-12 and cis-9 trans-11 affects the insulin resistance in healthy overweight and obese male and female adults,	Olive oil	Olive oil	4,5 g/dia	4.5	CLA	unsaturated	37,5% cis-9 trans-11 and 38% trans-10 cis-12	3,4 g/dia	BMI (kg/m2)	17	23	29.9	3.78	0	0.25	24	26	30.5	3.3	-0.06	0.4		Sem diferença intragrupo (24semanas x baseline)
Tapsell et al, 2013 a	2013	Foods, nutrients or whole diets: effects of targeting fish and LCn3PUFA consumption in a 12mo weight loss trial,	ACTRN12608000425392	Parallel	Australia	118	Adults with overweight or obesity	45,1 + 8,4	31,3 ± 3,5	31	26.3	48	capsula	to assess the effects of advice to consume 2 fish meals per week in a weight loss diet,	Olive oil	low calorie + olive oil	1g/dia	1	Fish + olive oil	unsaturated	low calorie + fish + olive oil	fish 180g/semana e olive oil 1g/dia	BMI (kg/m2)	9	39	28	3.6	-2.9	NI	25	39	28.2	3.4	-3.2	NI	Nenhum diferença significativa entre grupos	Sem diferença intragrupo (48 semanas x baseline)
Tapsell et al, 2013 b													capsula		Olive oil	low calorie + olive oil	1g/dia	1	Fish + EPA/DHA	unsaturated	low calorie + fish + eicosapentaenoic acid (EPA)/docosahexanoic acid (DHA) suplement	fish 180g/semana e EPA/DHA suplement (420 mg EPA + 210 mg DHA; Blackmore’s Promega Heart, Blackmores Australia),	BMI (kg/m2)	9	39	28	3.6	-2.9	NI	20	36	29.8	3.5	-1.8	NI
Taylor et al, 2006	2006	Conjugated Linoleic Acid Impairs Endothelial Function	NI	Parallel	UK	40	Men with overweight or obesity	45,95 ± 7,0	33 ± 3,0	40	100	12	cápsula	To determine the effect of dietary supplementation with conjugated linoleic acid (CLA) on body mass index (BMI), body fat distribution, endothelial function, and markers of cardiovascular risk,	Olive oil	Olivel oil	4,5 g/day	4.5	CLA	unsaturated	CLA mixture	4,5 g/day	BMI (kg/m²)	19	19	33.3	3.78	0.3	0.5	21	21	32.9	3.3	-0.1	0.7		Sem diferença intragrupo (12 semanas x baseline)
