# Supplementary material for: Olive oil and body fat: a systematic review withmeta-analysis
Source: Royal Society of Chemistry journal article supplement (doi:10.1039/d3fo00488k), 2023-01-01
Supplement: d3fo00488k5.xlsx [file d3fo00488k5.xlsx]

## Sheet: Planilha1
Author	Ano	Nome do artigo	nº registro clinical trials	Parallel or Crossover	País	n total	caracteríticas da população	idade (média ± DP) se min e max descrever	IMC (média ± DP) se min e max descrever	Sexo masculino (n)	Sexo masculino (%)	Tempo de intervenção (semanas) 1mês = 4 semans	vehicule	objetivo do estudo	intervenção A	Descrição da intervenção A	Quantidade intervenção A	dose	intervenção B	Descrição da intervenção B	type	Quantidade intervenção B	Desfecho (ex,: peso, IMC, % GC total, %GC em diferentes regiões, CC, RCQ)	n_final_intervA	n_randomizado_A	media_finalA	SD_finalA	Delta A (final - inicial)	SD delta A	n_final_intervB	n_randomizado_B	media_finalB	SD_finalB	Delta B (final - inicial)	SD delta B	Outra forma de resultado ex,: % que ganhou peso; RR ou OR, etc,	Observação dados disponíveis (erro padrão da média ou do delta, IC 95% da média ou delta, valor p da diferença pré e pós intervenção de cada braço, gráfico com média ou deltas)
Berven et al, 2000													capsule		Olive oil	Olive oil	4,5g/dia	4.5	CLA	CLA+750 mg safflower oil	unsaturated	3,4 g/dia	Lean mass (kg)	22	30	60.4	12.5	-1.5	4.4	25	30	59.9	13.1	-0.2	2.2		Sem diferença intragrupo (12semanas x baseline)
Blankson et al, 2000 a	2000	Conjugated Linoleic Acid Reduces Body Fat Mass in Overweight and Obese Humans	NI	Parallel	Norway	60	Healthy subjects with overweight or obesity	45,47 ± 12,04	29,12 ± 2,63	20	33.3	12	capsule	To investigate the dose-response relationships of conjugated linoleic acid with regard to body fat mass in humans	Olive oil	Olive oil	9g/dia	9	CLA 1,7 g	CLA 1,7g	unsaturated	1,7 g/day	lean body mass (kg)	2	12	45.6	9.8	-0,05	2.43	11	12	49.5	9.7	0.87	1.57		Sem diferença intragrupo (12 semanas x baseline)
Blankson et al, 2000 b	2000	Conjugated Linoleic Acid Reduces Body Fat Mass in Overweight and Obese Humans	NI	Parallel	Norway	60	Healthy subjects with overweight or obesity	45,47 ± 12,04	29,12 ± 2,63	20	33.3	12	capsule	To investigate the dose-response relationships of conjugated linoleic acid with regard to body fat mass in humans	Olive oil	Olive oil	9g/dia	9	CLA 3,4 g	CLA 3,4 g	unsaturated	3,4 g/day	lean body mass (kg)	2	12	45.6	9.8	-0,05	2.43	7	12	49.1	9.8	1.26	2.17
Blankson et al, 2000 c	2000	Conjugated Linoleic Acid Reduces Body Fat Mass in Overweight and Obese Humans	NI	Parallel	Norway	60	Healthy subjects with overweight or obesity	45,47 ± 12,04	29,12 ± 2,63	20	33.3	12	capsule	To investigate the dose-response relationships of conjugated linoleic acid with regard to body fat mass in humans	Olive oil	Olive oil	9g/dia	9	CLA 5,1 g	CLA 5,1 g	unsaturated	5,1 g/day	lean body mass (kg)	2	12	45.6	9.8	-0,05	2.43	11	12	48.6	12.9	0.54	1.44
Blankson et al, 2000 d	2000	Conjugated Linoleic Acid Reduces Body Fat Mass in Overweight and Obese Humans	NI	Parallel	Norway	60	Healthy subjects with overweight or obesity	45,47 ± 12,04	29,12 ± 2,63	20	33.3	12	capsule	To investigate the dose-response relationships of conjugated linoleic acid with regard to body fat mass in humans	Olive oil	Olive oil	9g/dia	9	CLA 6,8 g	CLA 6,8 g	unsaturated	6,8 g/day	lean body mass (kg)	2	12	45.6	9.8	-0,05	2.43	10	12	51	10.6	0.88	1.06
Félix-Soriano et al, 2021 a													capsule		Olive oil	6 cápsulas de 0,5 g	3 g	3	Ômega-3	Concentrado de óleo de peixe rico em DHA, 1650 mg/dia de DHA e 150 mg/dia de EPA, totalizando 1950 mg/dia de PUFA	unsaturated	3 g	Lean mass (%)	10	21	51.97	6.99	2.21	1.08	8	21	53.01	6.79	1.49	1.26
Félix-Soriano et al, 2021 b													capsule		Olive oil	6 cápsulas de 0,5 g	3 g	3	DHA-rich fish oil concentrate + resistance training	6 cápsulas seguidas de programa progressivo de treino de resistência (2x/semana)	unsaturated	3 g	Lean mass (%)	10	21	51.97	6.99	2.21	1.08	8	22	52.54	6.79	2.01	2.34
Félix-Soriano et al, 2021 c													capsule		Olive oil	6 cápsulas de 0,5 g	3 g	3	DHA-rich fish oil concentrate + resistance training	6 cápsulas seguidas de programa progressivo de treino de resistência (2x/semana)	unsaturated	3 g	Lean mass (%)	10	21	51.86	6.79	1.7	1.43	8	22	52.54	6.79	2.01	2.34
Félix-Soriano et al, 2021 d													capsule		Olive oil + resistance training	6 cápsulas seguidas de programa progressivo de treino de resistência (2x/semana)	3 g	3	Ômega-3	Concentrado de óleo de peixe rico em DHA, 1650 mg/dia de DHA e 150 mg/dia de EPA, totalizando 1950 mg/dia de PUFA	unsaturated	3 g		10	21	51.86	6.79	1.7	1.43	7	21	53.01	6.79	1.49	1.26
Gaullier et al, 2004 a													capsule		Olive oil	Olive oil	4,5g/dia	4.5	CLA-FFA	80% CLA-FFA (3,6 g active CLA isomers,)	unsaturated	4,5 g/dia	Lean Body Mass (kg)	30	59	47.1	9.6	0	1.5	61	61	47.2	7.8	0.7	2	aumento da massa magra em CLA FFA	Com diferença intragrupo ( 8 semanas x baseline)
Gaullier et al, 2004 b													capsule		Olive oil	Olive oil	4,5g/dia	4.5	CLA-Tri	76% CLA-triacylglycerol (3,4 g active isomers, n 60),	unsaturated	4,5 g/dia	Lean Body Mass (kg)	29	59	47.1	9.6	0	1.5	60	60	47	8	0.6	1.8
Jannas-Vela et al, 2020													capsule		Olive oil	Olive oil	5g/dia	5	Fish oil	Fish oil - Omega-3 Complete (1 g FO/capsule, Jamieson Laboratories Ltd,) / (2 g / dia de ácido eicosapentaenóico e 1 g / dia docosahexaenóico)	unsaturated	5g/dia (2g/day Epa + 1g/day DHA)	lean mass (%)	11	12	66.3	8.62	-0.7	NI	11	12	64.8	6.3	-0.5	NI		Sem diferença intragrupo (12semanas x baseline)
Kabiri et al, 2017													food		Olive oil	Extra Virgin olive oil	32g/dia	32	Usual diet	Usual diet 15% of energy from protein, 51% from carbohydrate, 34% from total fat (16% saturated fatty acid, 8% monounsaturated fatty acid, and 10% polyunsaturated fatty acid),	NI	-	Fat free mass (kg)	17	26	42.1	0.8	-0.9	0.36	17	26	42.2	0.9	´-0,9	0.25		Sem diferença intragrupo (6semanas x baseline)
Kreider et al, 2002													capsule		Olive oil	Olive oil	9 g/day	9	CLA	CLA (com 3 g de ácidos graxos)	unsaturated	6g/dia	Fat/bone-free mass (kg)	12	NI	59	1.9	0.05	0.2	11	11	62	2.5	0.28	0.2
Larsen et al, 2006													capsule		Olive oil	Hypocaloric diet + olive oil	4,5 g/dia	4.5	Hypocaloric diet + CLA	CLA ( of a mixture of c9,t11 and c10,t12 as triacylglycerols)	unsaturated	3,4g/dia	fat free mass (kg)	43	50	60.2	12.3	0.51	1.77	40	51	57.4	11.7	0.94	1.74		Sem diferença intragrupo (52 semanas x baseline)
López-Plaza et al, 2013													food		Olive oil	Olive oil + 200 mL skimmed milk	3g/dia	3	CLA	CLA + 200 ml skimmed milk	unsaturated	3g/dia	Lean mass (kg)	16	20	42.49	7.73	-0.56	2.27	22	22	44.69	1.02	-0.66	2.41		Sem diferença intragrupo (24 semanas x baseline)
Oliveira et al, 2017 a													food		Olive oil	Olive oil	27g/dia	27	Flaxseed oil	Flaxseed oil	unsaturated	27,9g/dia	Fat free mass (kg)	12	NI	51.1	7.72	1	NI	26	NI	51.6	7.37	0.1	NI		SEm diferença intragrupo (12 semanas x baseline)
Oliveira et al, 2017 b													food		Olive oil	Olive oil	27g/dia	27	Sunflower oil	Sunflower oil	unsaturated	27,6g/dia	Fat free mass (kg)	12	NI	51.1	7.72	1	NI	26	NI	48.6	7.9	-2	NI
Ornella et al, 2019													food		Olive oil	LOVe diet + extra-virgin olive oil	46g/dia	46	omega 3	LOVe diet + flaxseed oil, wlnusts and almonds	unsaturated	23g / dia	Fat free mass (Kg)	22	28	46.1	2.9	-1.6	2.2	18	26	47.9	3.8	-0.7	1.6		Sem diferença intragrupo (16 semanas x baseline)
Park et al, 2008 a													capsule		Olive oil + AF (3 x/sem)	olive oil	2,4g/dia	2.4	CLA + AF (3 x/sem)	CLA (mixture containing 36,9% of cis-9, trans-11 and 37,9% of trans-10, cis-12)	unsaturated	2,4g/dia	Lean body mass (kg)	8	15	44.1	4.26	0.04	0.7	15	15	45.6	7.74	-0.18	1.27		Sem diferença intragrupo (8 semanas x baseline)
Park et al, 2008 b													capsule		Olive oil + AF (3 x/sem)	olive oil	2,4g/dia	2.4	CLA + AF (3 x/sem)	CLA (mixture containing 36,9% of cis-9, trans-11 and 37,9% of trans-10, cis-12)	unsaturated	2,4g/dia	Muscle weight (kg)	7	15	40.9	3.87	0.03	0.61	15	15	42.3	6.97	1.89	7.82
Pérez et al, 2016 a													food		Olive oil	MedDiet + extra-virgin olive oil	128,5g/dia	128.5	Nuts	MedDiet + mixed nuts 30 g/day (15 g walnuts, 7,5 g hazelnuts, and 7,5 g almonds)	unsaturated	30g/dia	Free fat mass (kg)	56	117	50.2	6.99	-0.1	0.53	102	117	49.4	6.79	-0.6	0.38	Reduções significativas no grupo azeite e controle	Com diferença intragrupo (48 semanas x baseline)
Pérez et al, 2016 b													food		Olive oil	MedDiet + extra-virgin olive oil	128,5g/dia	128.5	Control	Advice to a low-fat diet	NI	NI	Free fat mass (kg)	56	117	50.2	6.99	-0.1	0.53	98	117	46.9	6.79	-1.5	0.33
Raff et al, 2009 a													capsule		Olive oil	5,5 g/dia corresponded to 4,2 g of oleic acid	5,5 g/dia	5.5	CLA MIX	40/40% of cis9,trans11-CLA (c9,t11-CLA - 2,3 g) and trans10,cis12-CLA (t10,c12-CLA - 2,2 g)	unsaturated	5,5 g/dia	Lean Body Mass (kg)	13	27	43.1	1.02	0.6	NI	25	27	43.3	1	0	NI		Sem diferença intragrupo (16 semanas x baseline)
Raff et al, 2009 b													capsule		Olive oil	5,5 g/dia corresponded to 4,2 g of oleic acid	5,5 g/dia	5.5	CLA	c9,t11-CLA isoform found in milk 4,7 g c9t11-CLA	unsaturated	5,5 g/dia	Lean Body Mass (kg)	13	27	43.1	1.02	0.6	NI	24	27	43.1	0.97	0.5	NI
Rezaei et al, 2019 a													food		Olive oil	Low calorie diet + exercise + olive oil	20 g/dia	20	Sunflower oil	Low calorie diet + exercise + sunflower oil	unsaturated	20 g/dia	fat free mass (kg)	13	32	52.5	11.5	-0.86	3.6	28	34	50.5	9.2	-1	2.2	Redução no grupo sunflower	Com diferença intragrupo (12 semanas x baseline)
Rezaei et al, 2019 b													food		Olive oil	Low calorie diet + exercise + olive oil	20 g/dia	20	Sunflower oil	Low calorie diet + exercise + sunflower oil	unsaturated	20 g/dia	Skeletal muscle mass (kg)	13	32	30	6.5	0.45	2.8	28	34	28.4	5.9	-0.71	1.36
Risérus et al, 2004													capsule		Olive oil	olive oil; 83% triacylglycerol	3g/dia	3	CLA	(6 capsules/d; 1% of total energy intake) as c9,t11 CLA (83% triacylglycerol)	unsaturated	3g/dia	Lean body mass (kg)	12	12	62.22	6.99	1.22	2.85	13	13	61.74	6.79	0.14	1.7		Sem diferença intragrupo (12 semanas x baseline)
Roynette et al, 2008													food		Olive oil	Extra virgin olive oil	100g/dia	100	Structured oil	medium and long chain triglycerides	saturated	100g/dia	Muscle (kg)	23	32	48.19	5.27	0.01	NI	23	32	48.39	5.27	-0.25	NI
Sales et al, 2005 a													food		Olive oil	Olive oil+milkshake	50,4g/dia	50.4	Peanut oil	Peanut oil+milkshake	unsaturated	51,5g/dia	Lean mass kg	3	8	51.3	6.99	0	NI	8	8	50.2	6.79	-0.7	NI
Sales et al, 2005 b													food		Olive oil	Olive oil+milkshake	50,4g/dia	50.4	Safflower oil	Sanfflower oil+milkshake	unsaturated	51,5g/dia	Lean mass kg	3	8	51.3	6.99	0	NI	8	8	48.9	6.79	-0.4	NI
Sales et al, 2005 c													food		Olive oil	Olive oil+milkshake	50,4g/dia	50.4	Controle	Controle	NI	Não recebeu milkshake	Lean mass kg	2	8	51.3	6.99	0	NI	8	8	46.8	6.79	-1.7	NI
Spriet et al, 2015													capsule		Olive oil	Organic olive oil	3g/dia	3	Fish oil	Omega-3 Complete, Jamieson Laboratories Ltd,, Windsor, ON, CA) administrado em 5 cápsulas, com cada cápsula fornecendo 400 mg de EPA e 200 mg de DHA	unsaturated	5g/dia	lean mass (kg)	12	12	40.1	1.6	0.6	NI	12	12	41.9	1.3	1.6	NI	Aumento de massa magra significativo no grupo fish oil (omega 3)	Com diferença intragrupo (12 semanas x baseline)
Sravrinou et al, 2020													food		Olive oil	Virgin olive oil	18g/dia	18	Omega 3 and omega 6	Omega 3, omega 6, vitamin A, vitamin Eand gama tocopherol	unsaturated	20g/dia	Lean body mass (kg)	18	23	42.6	12.1	-0.2	NI	18	23	45.9	11.2	1.2	NI
