# Supplementary material for: Olive oil and body fat: a systematic review withmeta-analysis
Source: Royal Society of Chemistry journal article supplement (doi:10.1039/d3fo00488k), 2023-01-01
Supplement: d3fo00488k6.xlsx [file d3fo00488k6.xlsx]

## Sheet: Planilha1
Author	Ano	Nome do artigo	nº registro clinical trials	Parallel or Crossover	País	n total	caracteríticas da população	idade (média ± DP) se min e max descrever	IMC (média ± DP) se min e max descrever	Sexo masculino (n)	Sexo masculino (%)	Tempo de intervenção (semanas) 1mês = 4 semans	vehicule	objetivo do estudo	intervenção A	Descrição da intervenção A	Quantidade intervenção A	dose	intervenção B	type	Descrição da intervenção B	Quantidade intervenção B	Desfecho (ex,: peso, IMC, % GC total, %GC em diferentes regiões, CC, RCQ)	n_final_intervA	n_randomizado_A	media_finalA	SD_finalA	Delta A (final - inicial)	SD delta A	n_final_intervB	n_randomizado_B	media_finalB	SD_finalB	Delta B (final - inicial)	SD delta B	Outra forma de resultado ex,: % que ganhou peso; RR ou OR, etc,	Observação dados disponíveis (erro padrão da média ou do delta, IC 95% da média ou delta, valor p da diferença pré e pós intervenção de cada braço, gráfico com média ou deltas)
Félix-Soriano et al, 2021 a													capsule		Olive oil	6 cápsulas de 0,5 g	3 g	3	Ômega-3	unsaturated	Concentrado de óleo de peixe rico em DHA, 1650 mg/dia de DHA e 150 mg/dia de EPA, totalizando 1950 mg/dia de PUFA	3 g	Hip circumference	10	21	108.28	10.02	-2.4	2.97	8	21	109.5	8.18	-3	3.12
Félix-Soriano et al, 2021 b													capsule		Olive oil	6 cápsulas de 0,5 g	3 g	3	DHA-rich fish oil concentrate + resistance training	unsaturated	6 cápsulas seguidas de programa progressivo de treino de resistência (2x/semana)	3 g	Hip circumference	10	21	108.28	10.02	-2.4	2.97	8	22	110.29	8.18	-3.06	3.52
Félix-Soriano et al, 2021 c													capsule		Olive oil + resistance training	6 cápsulas seguidas de programa progressivo de treino de resistência (2x/semana)	3 g	3	DHA-rich fish oil concentrate + resistance training	unsaturated	6 cápsulas seguidas de programa progressivo de treino de resistência (2x/semana)	3 g	Hip circumference	10	21	107.48	8.18	-2.4	2.97	8	22	110.29	8.18	-3.06	3.52
Félix-Soriano et al, 2021 d													capsule		Olive oil + resistance training	6 cápsulas seguidas de programa progressivo de treino de resistência (2x/semana)	3 g	3	Ômega-3	unsaturated	Concentrado de óleo de peixe rico em DHA, 1650 mg/dia de DHA e 150 mg/dia de EPA, totalizando 1950 mg/dia de PUFA	3 g		10	21	107.48	8.18			7	21	109.5	8.18	-3	3.12
Khani et al, 2021													capsule		Olive oil	Olive oil	2 g/day	2	Ômega-3	unsaturated	Ômega-3	2g/day (180 mg EPA + 120 mg DHA)	Hip circumference (cm)	44	44	99.68	7.87	-0.32	NI	43	44	99.37	8.65	-0.25	NI
Larsen et al, 2006													capsule		Olive oil	Hypocaloric diet + olive oil	4,5 g/dia	4.5	Hypocaloric diet + CLA	NI	CLA ( of a mixture of c9,t11 and c10,t12 as triacylglycerols)	3,4g/dia	Hip circumference (cm)	43	50	110.7	7.9	6.1	5.9	40	51	106.7	7.3	4.9	6.3
Noroozi et al., 2012													capsule		Olive oil	Low calorie diet + olive oil	30 g/day	30	Control	NI	Low calorie diet	Low calorie diet	Hip circumference (cm)	29	29	113.3	13.6	-3.7	NI	27	29	108.7	10.9	-3.6	NI	NI
Park et al, 2008													capsule		Olive oil + AF (3 x/sem)	olive oil	2,4g/dia	2.4	CLA + AF (3 x/sem)	unsaturated	CLA (mixture containing 36,9% of cis-9, trans-11 and 37,9% of trans-10, cis-12)	2,4g/dia	Hip circunference (cm)	15	15	98.9	6.19	-0.57	2.16	15	15	98.5	5.42	-1.11	1.85
Prater et al, 2022													food		Olive oil	Azeite de oliva extravirgem em 2 refeições/dia	30% das calorias	NI	Óleo de algodão	unsaturated	Óleo de algodão em 2 refeições/dia	20% das calorias	Hip circumference	22	27	110.4	10.78	0.5	NI	21	22	107.9	6.41	0.2	NI	NI
Sales et al, 2005 a													food		Olive oil	Olive oil+milkshake	50,4g/dia	50.4	Peanut oil	unsaturated	Peanut oil+milkshake	51,5g/dia	Hip circumference	4	8	97.5	10.02	2.3	NI	8	8	97.9	8.18	1.7	NI
Sales et al, 2005 b													food		Olive oil	Olive oil+milkshake	50,4g/dia	50.4	Safflower oil	unsaturated	Sanfflower oil+milkshake	51,5g/dia	Hip circumference	4	8	97.5	10.02	2.3	NI	8	8	100.5	8.18	0	NI
Sravrinou et al, 2020													food		Olive oil	Virgin olive oil	18g/dia	18	Omega 3 and omega 6	unsaturated	Omega 3, omega 6, vitamin A, vitamin Eand gama tocopherol	20g/dia	Circunferência de quadril (cm)	18	23	107.6	13.8	-0.8	NI	18	23	103.6	10.4	-1.5	NI
Taylor et al, 2006													capsule		Olive oil	Olivel oil	4,5 g/day	4.5	CLA	unsaturated	CLA mixture	4,5 g/day	Hip circunference (cm)	19	19	110.4	10.02	0.4	1.4	21	21	109.99	8.18	-0.01	1.5
