# Supplementary material for: Olive oil and body fat: a systematic review withmeta-analysis
Source: Royal Society of Chemistry journal article supplement (doi:10.1039/d3fo00488k), 2023-01-01
Supplement: d3fo00488k7.xlsx [file d3fo00488k7.xlsx]

## Sheet: Planilha1
Author	Ano	Nome do artigo	nº registro clinical trials	Parallel or Crossover	País	n total	caracteríticas da população	idade (média ± DP) se min e max descrever	IMC (média ± DP) se min e max descrever	Sexo masculino (n)	Sexo masculino (%)	Tempo de intervenção (semanas) 1mês = 4 semans	vehicule	objetivo do estudo	intervenção A	Descrição da intervenção A	Quantidade intervenção A	dose	intervenção B	type	Descrição da intervenção B	Quantidade intervenção B	Desfecho (ex,: peso, IMC, % GC total, %GC em diferentes regiões, CC, RCQ)	n_final_intervA	n_randomizado_A	media_finalA	SD_finalA	Delta A (final - inicial)	SD delta A	n_final_intervB	n_randomizado_B	media_finalB	SD_finalB	Delta B (final - inicial)	SD delta B	Outra forma de resultado ex,: % que ganhou peso; RR ou OR, etc,	Observação dados disponíveis (erro padrão da média ou do delta, IC 95% da média ou delta, valor p da diferença pré e pós intervenção de cada braço, gráfico com média ou deltas)
Félix-Soriano et al, 2021 a													capsule		Olive oil	6 cápsulas de 0,5 g	3 g	3	Ômega-3	unsaturated	Concentrado de óleo de peixe rico em DHA, 1650 mg/dia de DHA e 150 mg/dia de EPA, totalizando 1950 mg/dia de PUFA	3 g	Waist/hip ratio	10	21	0.83	0.22	-0.01	0.01	8	21	0.84	0.07	-0.01	0.01
Félix-Soriano et al, 2021 b													capsule		Olive oil	6 cápsulas de 0,5 g	3 g	3	DHA-rich fish oil concentrate + resistance training	unsaturated	6 cápsulas seguidas de programa progressivo de treino de resistência (2x/semana)	3 g	Waist/hip ratio	10	21	0.83	0.22	-0.01	0.01	8	22	0.81	0.07	0	0.04
Félix-Soriano et al, 2021 c													capsule		Olive oil + resistance training	6 cápsulas seguidas de programa progressivo de treino de resistência (2x/semana)	3 g	3	DHA-rich fish oil concentrate + resistance training	unsaturated	6 cápsulas seguidas de programa progressivo de treino de resistência (2x/semana)	3 g	Waist/hip ratio	10	21	0.84	0.07	-0.01	0.01	8	22	0.81	0.07	-0.02	0.03
Félix-Soriano et al, 2021 d													capsule		Olive oil + resistance training	6 cápsulas seguidas de programa progressivo de treino de resistência (2x/semana)	3 g	3	Ômega-3	unsaturated	Concentrado de óleo de peixe rico em DHA, 1650 mg/dia de DHA e 150 mg/dia de EPA, totalizando 1950 mg/dia de PUFA	3 g		10	21	0.84	0.07			7	21	0.84	0.07
Kabiri et al, 2017													food		Olive oil	Extra Virgin olive oil	32g/dia	32	Usual diet	NI	Usual diet 15% of energy from protein, 51% from carbohydrate, 34% from total fat (16% saturated fatty acid, 8% monounsaturated fatty acid, and 10% polyunsaturated fatty acid),	-	Waist/hip ratio	17	26	0.76	1.6	-0.003	NI	17	26	0.76	0.001	-0.001	NI		Sem diferença intragrupo (6semanas x baseline)
Kontogianni et al, 2013													food		Olive oil	(Chorio extra virgin olive oil, Minerva; 0,13 g ALA, 11,3 g oleic) acid)	13,5g/dia	13.5	Flaxseed oil	unsaturated	(Organic Flax oil, Flora; 8 g ALA, 3 g oleic acid)	13,9g/dia	RCQ	37	54	0.77	0.07	0	NI	37	37	0.78	0.07	0	NI		Sem diferença intragrupo (6 semanas x baseline)
Kruse et al, 2020													food		Olive oil	Refined olive oil	45g/dia	45	Rapessed oil	unsaturated	Refined rapessed/Canola oil	46g/dia	WHR	11	11	1.02	0.02	-0.01	NI	15	16	1	0.2	-0.01	NI		Sem diferença intragrupo (8 semanas x baseline)
Lee et al, 2018 a													food		Olive oil	Extra virgin oil - As dietas de testetinha 2,000 kcal, com 30% kcal gordura total (sendo 20% das kcal da gordura de teste), 15% proteína kcal e 55% de carboidratos kcal,	39,6g/dia	39.6	High-oleic blended cooking oil	unsaturated	As dietas de teste tinham 2,000 kcal, com 30% kcal gordura total (sendo 20% das kcal da gordura de teste), 15% proteína kcal e 55% de carboidratos kcal,	40,6g/dia	Waist/hip ratio	16	35	0.85	0.05	0	NI	32	35	0.85	0.06	0	NI
Lee et al, 2018 b													food		Olive oil	Extra virgin oil - As dietas de testetinha 2,000 kcal, com 30% kcal gordura total (sendo 20% das kcal da gordura de teste), 15% proteína kcal e 55% de carboidratos kcal,	39,6g/dia	39.6	Coconut oil	saturated	As dietas de teste tinham 2,000 kcal, com 30% kcal gordura total (sendo 20% das kcal da gordura de teste), 15% proteína kcal e 55% de carboidratos kcal,	40,6g/dia	Waist/hip ratio	16	35	0.85	0.05	0	NI	32	35	0.84	0.05	-0.1	NI
López-Plaza et al, 2013													food		Olive oil	Olive oil + 200 mL skimmed milk	3g/dia	3	CLA	unsaturated	CLA + 200 ml skimmed milk	3g/dia	Waist/hip ratio	16	20	0.57	0.03	0	0.03	22	22	0.56	0.04	-0.02	0.03	Redução significativa no grupo CLA	Com diferença intragrupo (24 semanas x baseline)
Park et al, 2008													capsule		Olive oil + AF (3 x/sem)	olive oil	2,4g/dia	2.4	CLA + AF (3 x/sem)	unsaturated	CLA (mixture containing 36,9% of cis-9, trans-11 and 37,9% of trans-10, cis-12)	2,4g/dia	Waist/hip ratio	15	15	0.84	0.03	-0.003	0.02	15	15	0.84	0.07	0.007	0.03	Redução no grupo CLA	Com diferença intragrupo (8 semanas x baseline)
Prater et al, 2022													food		Olive oil	Azeite de oliva extravirgem em 2 refeições/dia	30% das calorias	NI	Óleo de algodão	unsaturated	Óleo de algodão em 2 refeições/dia	20% das calorias	Waist to hip ratio	22	27	0.83	0.09	0	NI	21	22	0.85	0.09	0	NI	NI
Sales et al, 2005 a													food		Olive oil	Olive oil+milkshake	50,4g/dia	50.4	Peanut oil	unsaturated	Peanut oil+milkshake	51,5g/dia	RCQ	3	8	0.8	0.22	0	NI	8	8	0.8	0.07	0	NI
Sales et al, 2005 b													food		Olive oil	Olive oil+milkshake	50,4g/dia	50.4	Safflower oil	unsaturated	Sanfflower oil+milkshake	51,5g/dia	RCQ	3	8	0.8	0.22	0	NI	8	8	0.8	0.07	0	NI
Sales et al, 2005 c													food		Olive oil	Olive oil+milkshake	50,4g/dia	50.4	Controle	NI	Controle	Não recebeu milkshake	RCQ	2	8	0.8	0.22	0	NI	8	8	0.8	0.07	0	NI
Smedman et al, 2001													capsule		Olive oil	Olive oil	4,2g/dia	4.2	CLA	unsaturated	capsules contained 75,9% CLA with equal amounts of the CLA isomers cis-9,trans-11 and trans-10,cis-12,	4,2g/dia	Waist/hip ratio	24	24	0.8	0.22	0	NI	26	26	0.8	0.07	0	NI
Sun et al, 2016													food		Olive oil	Olive oil	48 g/dia	48	Palm oil	saturated	Palm olein	48 g/dia	Waist/hip ratio	100	60	0.84	0.06	0.1	NI	100	60	0.83	0.06	0.1	NI		Sem diferença intragrupo (10 semanas x baseline)
Taylor et al, 2006													capsule		Olive oil	Olivel oil	4,5 g/day	4.5	CLA	unsaturated	CLA mixture	4,5 g/day	Waist/hip ratio	19	19	1.017	0.22	-0.003	0.03	21	21	1.02	0.07	0.01	0.22		Sem diferença intragrupo (12 semanas x baseline)
